1  
2  
3  
4  
5  
6  
7  
8  
9  
10  
11  
12  
13  
14  
15  
16  
17  
18  
19  
20  
21  
22  
23  
24  
25  
26  
27  
28  
29  
30  
31

## *In vitro* production of cat-restricted *Toxoplasma* pre-sexual stages by epigenetic reprogramming

Ana Vera Antunes<sup>1\*</sup>, Martina Shahinas<sup>1\*</sup>, Christopher Swale<sup>1\*</sup>, Dayana C. Farhat<sup>1,2</sup>,  
Chandra Ramakrishnan<sup>3</sup>, Christophe Bruley<sup>4</sup>, Dominique Cannella<sup>1</sup>, Charlotte Corrao<sup>1</sup>,  
Yohann Couté<sup>4</sup>, Adrian B. Hehl<sup>3</sup>, Alexandre Bougdour<sup>1</sup>, Isabelle Coppens<sup>5</sup>,  
and Mohamed-Ali Hakimi<sup>1 @</sup>

<sup>1</sup> Institute for Advanced Biosciences (IAB), Team Host-pathogen interactions and immunity to infection, INSERM U1209, CNRS UMR5309, University Grenoble Alpes, Grenoble, France.

<sup>2</sup> Plasmodium RNA Biology, Institut Pasteur, Paris, France.

<sup>3</sup> Institute of Parasitology, University of Zurich, Winterthurerstrasse 266a, CH-8057, Zürich, Switzerland.

<sup>4</sup> University Grenoble Alpes, CEA, INSERM, UA13 BGE, CNRS, CEA, FR2048, Grenoble, France.

<sup>5</sup> Department of Molecular Microbiology and Immunology Johns Hopkins University, Bloomberg School of Public Health and Malaria Research Institute, Baltimore, MD 21205, USA.

\* [These authors contributed equally to this work](#)

@ Correspondence to: Mohamed-Ali Hakimi (ORCID: [0000-0002-2547-8233](#))

E-mail : [mohamed-ali.hakimi@inserm.fr](mailto:mohamed-ali.hakimi@inserm.fr)

Phone +33 4 76 63 74 69

Key words: *Toxoplasma gondii*, gene expression, sexual commitment, epigenetic, Apetala, transcription factor, chromatin, merogony

## 32 Summary paragraph

33 Sexual reproduction of *Toxoplasma gondii*, which is restricted to the small intestine of  
34 felids, is sparsely documented, due to ethical concerns surrounding the use of cats as  
35 model organisms. Chromatin modifiers dictate the developmental fate of the parasite  
36 during its multistage life cycle, but their targeting to stage-specific cistromes is poorly  
37 described<sup>1</sup>. In this study, we found that transcription factors AP2XII-1 and AP2XI-2,  
38 expressed in tachyzoite stage that causes acute toxoplasmosis, can silence genes necessary  
39 for merozoites, a developmental stage critical for sexual commitment and transmission to  
40 the next host, including humans. Their conditional and simultaneous depletion leads to a  
41 drastic change in the transcriptional program, promoting a complete transition from  
42 tachyzoites to merozoites. Pre-gametes produced *in vitro* under these conditions are  
43 characterized by specific protein markers and undergo typical asexual endopolygenic  
44 division cycles. In tachyzoites, AP2XII-1 and AP2XI-2 bind DNA as heterodimers at  
45 merozoite promoters and recruit the epigenitors MORC and HDAC3<sup>1</sup>, which in turn  
46 restrict the accessibility of chromatin to the transcriptional machinery. Thus, the  
47 commitment to merogony stems from a profound epigenetic rewiring orchestrated by  
48 AP2XII-1 and AP2XI-2. This effective *in vitro* culture of merozoites paves the way to  
49 explore *Toxoplasma* sexual reproduction without the need to infect kittens and has  
50 potential for the development of therapeutics to block parasite transmission.

51

52 The parasite *Toxoplasma* is the causative agent of toxoplasmosis, a worldwide foodborne  
53 zoonosis that is particularly severe when opportunistic or congenital. *Toxoplasma* has a  
54 complex life cycle that includes several distinct developmental stages (Extended Data Fig. 1a).  
55 The biology of the fast-growing tachyzoites and semi-dormant bradyzoites responsible for acute  
56 and chronic disease, respectively, is well known because they are easy to culture and benefit  
57 from well-established mouse models. In contrast, sexual reproduction is still largely *terra*  
58 *incognita*. Early studies in the 1970s using infected kittens elegantly but only partially  
59 documented the sexual cycle of *Toxoplasma* by scrutinizing the ultrastructure of the pre-gamete  
60 zoites and the sexual dimorphic stages in the intestinal lining of infected *Felis catus*<sup>2-8</sup>. All  
61 developmental stages have their own transcriptional signature, and switching between stages is  
62 controlled by intricate transcriptional cascades in which covalent and noncovalent epigenetic  
63 mechanisms act as driving forces<sup>9,10</sup>. For example, tachyzoite and merozoite stages can be  
64 distinguished by their respective subtranscriptomes, with one being repressed during the other

65 stage<sup>11,12</sup>, a silencing function recently attributed to the chromatin modifier MORC. MORC  
66 functions as a central and early checkpoint of sexual commitment, and its conditional depletion  
67 promotes broad activation of sexual gene transcription in tachyzoites<sup>1</sup>. MORC forms a core  
68 complex with the histone deacetylase HDAC3, which bind strongly to a substantial number of  
69 Apetala (AP2) proteins<sup>1</sup> (Extended Data Fig. 1b). AP2 have emerged as candidate transcription  
70 factors (TFs) in all apicomplexan species, in which they play a critical role in regulating life  
71 cycle transitions<sup>9,13</sup>. It is thought that MORC/HDAC3-associated AP2s bind to specific  
72 sequences of DNA and direct the synchronized expression of stage-specific genetic programs<sup>10</sup>,  
73 but their relative contribution to *Toxoplasma* sexual fate still await further characterization.  
74 This study unveils the role of a complex network of transcriptional repressors in regulating the  
75 commitment to merogony in *Toxoplasma*.

76

### 77 **AP2XI-2 and AP2XII-1 jointly control gene expression.**

78 Using a loss-of-function CRISPR screen in *Toxoplasma*, we showed that of 14 MORC-  
79 associated AP2s, only AP2XI-2 or AP2XII-1, when inactivated, induced expression of GRA80  
80 (*TGME49\_273980*), a merozoite-specific protein to which we raised a specific antibody (Fig.  
81 1a and Extended Data Fig. 1c). Because both AP2s are essential for tachyzoite growth, as  
82 indicated by their fitness scores (Extended Data Fig. 1b), we used the minimal auxin-inducible  
83 degron (mAID) system to acutely and reversibly deplete their protein levels and examine  
84 subsequent phenotypes. Proteins tagged with mAID undergo proteolytic degradation in the  
85 presence of indole-3-acetic acid (IAA) (Supplementary Fig. 1a, b). As expected, IAA treatment  
86 of these edited parasites resulted first, in a specific and complete degradation of the bulk of  
87 AP2XI-2-mAID-HA and AP2XII-1-mAID-HA proteins (Extended Data Fig. 1d) and second in  
88 a simultaneous accumulation of merozoite proteins at different expression levels, depending on  
89 the parasite line. Thus, the merozoite reporter gene GRA81-mCherry was induced upon  
90 depletion of each AP2 individually, whereas GRA11b, a hallmark of merozoites<sup>14</sup>, was  
91 expressed exclusively after loss of AP2XII-1, and GRA80 levels were less pronounced in  
92 AP2XI-2-depleted parasites (Fig. 1b and Extended Data Fig. 1e). Thus, the loss of AP2XI-2  
93 does not fully mimic the depletion of AP2XII-1 in eliciting expression of the merozoite protein  
94 markers used here.

95

96 To examine the genome-wide transcriptional outcome of depleting each AP2 separately, we  
97 monitored mRNA levels using both Nanopore DRS and Illumina sequencing. After addition of  
98 IAA, substantial fractions of mRNAs were up- and down-regulated in a strain-specific manner,

99 as shown by hierarchical clustering analyses (Fig. 1c and Supplementary Fig. 1c,d and  
100 Supplementary Table 2). AP2XI-2- and AP2XII-1-regulated subtranscriptomes could be  
101 defined by specific clusters (A and B, respectively, Fig. 1c) of genes induced as a consequence  
102 of their depletion, including *GRA80* and *GRA81* (Fig. 1d and Extended Data Fig. 1f). AP2XI-2  
103 and AP2XII-1 also shared a small subset of differentially-regulated genes (n=67, Fig. 1e),  
104 suggesting that they function cooperatively or in the same pathways. We therefore examined  
105 the genetic relationship between these two TFs by editing a parasite strain with simultaneous  
106 knockdown (KD) of AP2XI-2 and AP2XII-1 compared with individual KD of either gene  
107 (Supplementary Fig. 1b). As expected, addition of IAA was accompanied by a near-complete  
108 loss of both proteins compared with untreated cells (Extended Data Fig. 1d). Double  
109 knockdown stimulated expression of genes from clusters A and B, but at a much higher level  
110 than single KD, and revealed a new cluster C (Fig. 1c,d and Extended Data Fig. 1f). Their  
111 depletion also resulted in suppression of gene expression (cluster D), a phenotype observed to  
112 a lesser extent with individual KD gene (Fig. 1c,d and Extended Data Fig. 1f). Simultaneous  
113 loss of both proteins resulted in a tailored transcriptional response characterized by more  
114 pronounced gene induction in terms of the number of genes affected and the expression levels  
115 of mRNAs and marked repression of a subset of genes, suggesting that AP2XI-2 and AP2XII-  
116 1 act synergistically or sequentially in regulating gene expression in *Toxoplasma*.

117

### 118 **AP2XI-2 and AP2XII-1 synergistically silence merozoite-primed sexual commitment.**

119 Comparative RNA-Seq analyzes showed that gene expression profiles after depletion of  
120 AP2XI-2 and AP2XII-1 perfectly matched the transcriptional state observed *in vivo* in  
121 enteroepithelial stages (EES) and merozoites collected from infected kittens<sup>11,12,15</sup>. Indeed, co-  
122 depletion of AP2XI-2 and AP2XII-1 predominantly and consistently induced the expression of  
123 genes specific to the pre-gametes at different developmental stages (clusters I, II, and III; Fig.  
124 1f). A limited number of bradyzoite genes are also affected, but together they do not form a  
125 characteristic transcriptional signature associated with the latent stage (cluster IV; Fig. 1f).  
126 However, a subset of genes expressed exclusively in tachyzoites was simultaneously silenced  
127 (clusters V and VI, Fig. 1f), a trend also observed in merozoites from the cat intestine<sup>11,12</sup>. The  
128 drastic changes in mRNA levels were also reflected in the abundance of the corresponding  
129 proteins: 18% of the 3,020 parasite proteins detected by mass spectrometry (MS)-based  
130 quantitative proteomics showed not only robust changes in abundance but also a highly  
131 polarized response to the merozoite stage, as underscored by our transcriptome analysis  
132 (Supplementary Fig. 2 and Table 3). In this context, the proteome of IAA-treated parasites

133 shifted toward the pre-gametes stages, resulting in a significant over-expression of 276 proteins,  
134 whereas the expression of 285 tachyzoite proteins was suppressed after treatment  
135 ([Supplementary Fig. 2c and Table 3](#)). Treated parasites displayed RNA and protein expression  
136 profiles with a specific distribution of gene products (or functional categories), similar to  
137 enteroepithelial merozoites<sup>11,12</sup>. Overall, housekeeping functions were not altered in IAA-  
138 treated parasites as confirmed by our proteomic analysis, in which no significant changes were  
139 detected in 82% of the 3,020 quantified proteins. Nor was their metabolic capacity changed,  
140 with the exception of induction of genes involved in purine metabolism, a phenotypic feature  
141 of merozoites found in the gut of cats<sup>12</sup>.

142

### 143 **Simultaneous depletion of AP2XI-2 and AP2XII-1 switches from tachyzoites to** 144 **merozoites features.**

145 The process of invasion has been thoroughly examined, revealing the cryptic functions of  
146 organelle-resident proteins, specifically in the tachyzoite stage<sup>16</sup>. First, micronemes secrete  
147 proteins (MICs) that function as adhesins that facilitate attachment to the host cell and thus play  
148 a key role in motility and invasion. Following attachment to host cells, rhoptries release their  
149 neck (RON) and bulb (ROP) proteins, which interact with MIC proteins and contribute to  
150 parasite entry by opening the host cell membrane and directing the formation of parasitophorous  
151 vacuole. This function is primarily attributed to the RON complex. The final wave of secretion  
152 occurs with the release of proteins from the dense granules (GRA) that are involved in  
153 intravacuolar function, such as the formation of a tubulovesicular network (TVN), but also act  
154 at the PVM or operate as extravacuolar effectors to subvert host signaling pathways and  
155 reprogram host gene expression<sup>17</sup>. It was reported that the majority of MIC, ROP, and GRA  
156 proteins secreted by tachyzoites and bradyzoites are not expressed in merozoites<sup>11,12,18,19</sup>.  
157 Consistently, we observed a complete switch in the expression of many known MIC, ROP, and  
158 GRA proteins upon addition of IAA as well as undescribed secretory proteins that appear to be  
159 involved in promoting asexual replication of merozoites ([Supplementary Fig. 3](#)).

160

161 For example, in IAA-treated parasites, MIC proteins that are highly expressed in tachyzoites  
162 and secreted as functional complexes, were strongly suppressed (e.g., MIC2 and AMA1; [Fig.](#)  
163 [2a](#)). Conversely, merozoite-specific MICs such as the MIC17a,b,c cluster and AMA2, the  
164 ortholog of AMA1 in pre-gametes, were markedly induced ([Fig. 2a](#)), and transcriptional  
165 reprogramming was highly specific, as levels of SporAMA1, its counterpart in the sporozoite,  
166 a quiescent stage found in sporulated oocysts, remained unchanged ([Supplementary Table 2](#)).

167 The combined depletion of AP2XI-2 and AP2XII-1 silenced 80% of the 143 rhostry proteins  
168 described or predicted by hyperLOPIT to be tachyzoite-specific (Fig. 2b and Supplementary  
169 Fig. 3a). These include the components of the RON complex as well as ROP16, ROP18, and  
170 ROP5, which function as effectors to protect parasites from host cellular defenses and thwart  
171 immune responses. Only a few known rhostry proteins were induced, including BRP1, which  
172 is abundant in both bradyzoite and merozoite stages<sup>20</sup>, and a family of ROP5-related kinases,  
173 referred to here as the ROP26 family, which is expressed exclusively in pre-gametes (Fig. 2d).

174

175 We observed a similar tendency toward silencing of the tachyzoite program and activation of  
176 the merozoite program when we examined GRA mRNA and protein levels in response to co-  
177 depletion of AP2XI-2 and AP2XII-1 (Fig. 2c and Supplementary Fig. 3b). For example, the  
178 levels of the TVN core proteins, i.e. GRA2, GRA4, and GRA6, decreased dramatically over  
179 time, as did the MYR-dependent effectors GRA16, GRA24, or TgIST in IAA-treated parasites  
180 (Fig. 2c). In striking contrast, genuine pre-gametes markers (GRA11a and GRA11b<sup>14</sup>), as well  
181 as unannotated set of GRA proteins, were expressed exclusively in merozoites (Fig. 2c), such  
182 as GRA80, GRA81, and GRA82 showing a punctate pattern in the IAA-treated parasites that  
183 occasionally overlap with the canonical merozoite GRA11b (Fig. 2g-h; Extended Data Fig. 1e  
184 and Fig. 2a). Upon secretion, GRA80, GRA81, and GRA82 localized to the vacuolar space  
185 and/or the PV membrane (PVM), but differ in their secretion kinetics. Interestingly, GRA80  
186 labelled mature schizonts that reproduce asexually in the cat small intestine (Fig. 2e, f). GRA80  
187 was detected *in vitro* in dense granules at an early time point after addition of IAA, then secreted  
188 in the vacuolar space to associate with the PV membrane both in cat gut stages (Fig. 2f) and *in*  
189 *vitro* in cultured fibroblasts (Fig. 2g,h). GRA80 eventually crossed the PVM to spread into the  
190 host cell cytoplasm (lower panel in Fig. 2g). On the other hand, GRA82 was detectable only  
191 after 48 hours in the mature merozoite and contrasts with the kinetics of GRA11b and GRA80,  
192 which are induced in the parasite and the vacuole at the onset of merogony (Extended Data Fig.  
193 2a).

194

195 This transcriptome/proteome shift from the tachyzoite to the merozoite program also occurs in  
196 other protein families and leads, for example, to a dramatic restructuring of the proteins on the  
197 surface of the zoite after IAA treatment, including the deemed SAG-Related Surface (SRS)  
198 protein family (Extended Data Fig. 2b). Compared to tachyzoites, merozoites express the  
199 largest repertoire of SRS, e.g., the SRS48 (Fig. 2d) and SRS59 (Extended Data Fig. 2c) families,  
200 which have been predicted to promote gamete development and fertilization<sup>12</sup>. Accordingly,

201 90% of the known 88 SRS were induced in IAA-treated parasites phenocopying the merozoite  
202 stage, while all tachyzoite-specific SRS were simultaneously suppressed ([Supplementary Fig.](#)  
203 [3d](#)). This transition to pre-gametes is also accompanied by the expression of 29 of the 33  
204 members of Family A in treated parasites ([Extended Data Fig. 2d,e](#)), which are recognized as  
205 predominant secreted and/or membrane-associated merozoite proteins<sup>11,12</sup>.

206  
207 Overall, AP2XI-2- and AP2XII-1-depleted parasites share common features with *bona fide*  
208 merozoites, notably the abrogation of the characteristic molecular signature of tachyzoites and  
209 expression of a specialized merozoite proteome. Phenotypically, treatment with IAA results in  
210 a decrease in parasite infectivity over time, likely due to suppression of key proteins required  
211 for motility, attachment, or invasion in tachyzoites. As a result, *in vitro* converted merozoites  
212 fail to egress and to re-invade new host cells after a period of proliferation, as evidenced by the  
213 dramatic reduction of lytic plaques in treated parasites compared to untreated parasites  
214 ([Extended Data Fig. 2f](#)).

215  
216 **AP2XI-2/AP2XII-1-depleted parasites undergo several rounds of schizogonic replication**  
217 **to produce merozoites.**

218 Our understanding of pre-sexual stages at the cellular level goes back to the original description  
219 by Dubey and Frenkel (1972)<sup>21</sup>, who systematically recorded the morphological details of five  
220 pre-gamete stages, designated merozoites A to E, proposed to be formed sequentially during  
221 colonization of the epithelial cells of the cat intestine prior to gamete formation ([Fig. 3a](#)). These  
222 morphotypes vary in size and shape, appearing in different areas of the cat's digestive tract  
223 asynchronously, making challenging the analysis of pre-sexual stages *in vivo*<sup>18,19,22,23,24</sup>. We  
224 then investigated to which extent the zoites produced during *in vitro* induced merogony share  
225 the same morphological structural features as their counterparts observed *in vivo*. For this  
226 purpose, we performed IFA using antibody toolkit originally developed for studying the  
227 subcellular content and division of tachyzoites (i.e., antibodies recognizing inner membrane  
228 complex or IMC<sup>25</sup>) and transmission electron microscopy (TEM).

229  
230 As a first step 24h post-IAA addition, the nucleus of the mother cell undergoes multiple fissions  
231 with the maintenance of the nuclear envelope, leading to individualized nuclei (in even  
232 numbers, varying from 4 up to 10) ([Fig. 3b](#)). Concomitantly, single organelles, such as the  
233 apicoplast and the Golgi apparatus expand and multiply to reach number equal to the number  
234 of the nucleus. Transversal cross-sections of the apicoplast (limited by four membranes) reveals

235 its elongation and constriction, suggestive of replication by scission (Fig. 3c), which was also  
236 visualized by immunofluorescence with the ATrx1 antibody<sup>26</sup> (Extended Data Fig. 3a) and is  
237 consistent with maternal inheritance of the apicoplast observed in meronts in the cat intestine<sup>27</sup>.  
238 Multiple Golgi complexes are formed at different sites of the nucleus, sometimes in opposing  
239 orientations, suggestive of *de novo* formation (Fig. 3d); the multiplication mode of other  
240 organelles, like secretory organelles are unknown. At this stage, the multinucleated mother cell  
241 contains several sets of organelles randomly distributed throughout the cytoplasm. Despite the  
242 increase in size of the mother cell, the subpellicular IMC is still prominently present beneath  
243 the plasma membrane. The parasites that exhibit a characteristic ovoid shape with 4 and 8 nuclei  
244 are morphologically related to the cryptic and early meronts, namely B and C morphotypes<sup>21</sup>  
245 (Fig. 3e and Extended Data Fig. 3b).

246  
247 As a second step, new flattened vesicles of the IMC appear in the mother cytoplasm, and  
248 progressively elongate allowing the sub-compartmentalization of organelles destined for each  
249 daughter cell (Fig. 3f). This process of internal budding of more than two daughter cells  
250 (referred here as endopolygeny)<sup>23,28,29,30,31</sup> differs from the tachyzoite division by endodyogeny  
251 in which the two daughter cells are generated symmetrically and in a synchronous manner in  
252 the mother cell (Fig. 3g). Alongside with the expansion of daughter buds, the mother IMC and  
253 conoid show partial disassembly. Interestingly, rhoptries inside daughter cells are different in  
254 shape and electron-density from mother rhoptries dispersed in the cytoplasm, suggesting *de*  
255 *novo* biogenesis of rhoptries (Fig. 3h) which can be also followed with the merozoite-specific  
256 protein ROP26 (Fig. 3i). This finding is in line with the observation that the bulbous end of the  
257 rhoptry in the meronts of infected cats remains spherical, in contrast to tachyzoites and  
258 bradyzoites<sup>24</sup>. In these multinucleated structures, it was possible to identify daughter IMC  
259 stained with IMC1, whereas GAP45 staining was restricted to the periphery of the mother cell  
260 (Fig. 3j, Extended Data Fig. 3c). Daughter cells become polarized with the formation of a  
261 conoid and apical distribution of micronemes, rhoptries, the apicoplast and the Golgi apparatus  
262 (Fig. 4a, Extended Data Fig. 3d). At this stage, it is clear that the maternal conoid coexists with  
263 the newly formed conoids of the progeny, as shown by the labelling of apically methylated  
264 proteins (Fig. 4b). After final assembly, the daughter cells emerge separately, wrapped by the  
265 plasma membrane of the mother cell (cortical or peripheral budding) (Fig. 4c,d), forming fan-  
266 like structures as previously described in infected cat cells<sup>23</sup>.

267



268 Compared to tachyzoites, these newly formed parasites are thinner and do not form a rosette-  
269 like structure within the PV but instead are aligned, with their apex facing the PV membrane  
270 (Extended Data Fig. 3e,f); these features are reminiscent to those of type D-like merozoites  
271 produced in feline intestinal cells from meront entities at the onset of infection<sup>29,30,31</sup>.  
272 Interestingly, the PV membrane of merozoites also forms physical interactions with host ER  
273 and mitochondria, perhaps for nutrient acquisition<sup>32</sup> (Extended Data Fig. 3e). A frequent  
274 observation is the presence of multiple parasites in a single PV undergoing endopolygeny  
275 (Supplementary Fig. 4a,b). When we monitored the degree of ploidy with the DNA-specific  
276 dye Hoechst and by staining with a centrosome marker (human centrin, Supplementary Fig.  
277 4c,d) or pan-acetylated histone H4 (Supplementary Fig. 4e), we observed that nuclear division  
278 cycles within the same schizont were not synchronous.

279

### 280 **Fully developed merozoites produced *in vitro* have conserved and distinct subcellular** 281 **features**

282 Extension of the IAA treatment for additional 16 hours reveals the presence of very large  
283 meronts containing numerous daughter cells in formation (Fig. 4e,f). These meronts are  
284 detected in the same PV together with fully formed merozoites (Fig. 4f), as their counterpart in  
285 the cat gut (Fig. 4g). Mature polyploid meronts can be visualized by IMC7 staining on their  
286 surface, whereas fully formed merozoites were completely negative for IMC7 (Fig. 3e,i,  
287 Extended Data Fig. 3b), a phenotype also been observed in pre-gametes developing in the cat  
288 gut<sup>25</sup>. Remarkably, we identified new merozoite-specific markers that clearly distinguish the  
289 two morphotypic populations. For example, ROP26 exclusively marks zoites undergoing  
290 schizogonic replication, in contrast to GRA11b and GRA80 expression, which are restricted to  
291 mature merozoites (Fig. 3i and Extended Data Fig. 4a). As merozoites undergo several cycles  
292 of endopolygeny, they acquire novel distinct morphological features compared to first-  
293 generation merozoites (24 hours post-IAA), likely type E<sup>23</sup>. Some merozoites appear sausage-  
294 shaped, with a diameter of 1.5-1.8 micron, packed in the PV without any spatial organization  
295 (Extended Data Fig. 4b,c). These forms contain similar organelles found in tachyzoites but  
296 surprisingly, they exhibit an extruded conoid (Extended Data Fig. 4d). Other PV contain  
297 peripherally arranged parasites, leaving a large empty space (Extended Data Fig. 4e,f),  
298 reminiscent to schizont PV formed in feline intestinal cells<sup>23</sup>. Interestingly, these parasites at  
299 the PV edge adopt two configurations: either they have a very large cell body (trapezoid) with  
300 a diameter up to 5 microns or a very thin and elongated shape (tubular), with a diameter of 200-  
301 250 nm (Extended Data Fig. 4g,h). These latter do not contain nucleus but mitochondria profiles

302 and ribosomes are observed. Their origin and formation remain to be determined but their  
303 abundance in PV likely suggest a physiological relevance in the *Toxoplasma* lifecycle.

304

### 305 **AP2XI-2 and AP2XII-1 bind as a heterodimer to HDAC3 and MORC.**

306 AP2XI-2 and AP2XII-1 likely synergize to suppress gene expression in tachyzoites, but their  
307 *modus operandi* is still enigmatic. Both proteins were originally found in a MORC pulldown  
308 along with HDAC3 in tachyzoites<sup>1</sup>. We confirmed their strong and specific association with  
309 MORC/HDAC3 by reverse immunoprecipitation combined with MS-based proteomic and  
310 Western blot analyses using knock-in parasite lines expressing a FLAG tagged version of  
311 AP2XI-2 or AP2XII-1 (Fig. 5a,b). MS-based proteomics found both AP2 proteins in co-  
312 immunoprecipitation eluates, indicating that they are part of the same operating complex (Fig.  
313 5c and Supplementary Table 4 and 5). To support this hypothesis, we used baculovirus to  
314 transiently co-express epitope tagged AP2XI-2-Flag and AP2XII-1-(Strep)<sub>2</sub> in insect cells (Fig.  
315 5d). AP2XII-1 was purified by Strep-Tactin affinity chromatography and its partnership with  
316 AP2XI-2 was confirmed by Western blotting and MS-based proteomics (Fig. 5e and  
317 Supplementary Table 6). Consistent with AP2XI-2 and AP2XII-1 being part of a heterodimer,  
318 these two proteins coelute in the same gel filtration fractions, in a MORC- and HDAC3-  
319 independent manner (Fig. 5e). Many transcription factors, including apicomplexan AP2 were  
320 reported to form homo- and heterodimers with different partners that modulate DNA binding  
321 specificity and affinity<sup>33,34</sup>. In this context, AP2XI-2 and AP2XII-1 likely bind cooperatively  
322 as a heterodimer to DNA to selectively and synergistically repress merozoite gene expression,  
323 and only their simultaneous depletion leads to achievement of the developmental program  
324 critical for merozoite formation.

325

### 326 **AP2XI-2 and AP2XII-1 colocalize extensively in the genome where they recruit MORC 327 and HDAC3 to reduce chromatin accessibility.**

328 To further explore how AP2XI-2 or AP2XII-1 cooperate in *Toxoplasma* to silence gene  
329 expression, we examined their genome-wide distribution using chromatin immunoprecipitation  
330 followed by deep sequencing (ChIP-seq; GSE222819) in the context of their conditional single  
331 or double knockdown. In parallel, we generated high-resolution profiles of MORC and HDAC3  
332 using in-house ChIP-grade antibodies. The enrichment at chromatin of AP2XII-1, which is the  
333 highest, was used as a proxy to analyze the distribution of loci to which the repressive complex  
334 binds. As a result, we identified two clusters of genes with significant enrichment in their  
335 environment: Cluster 1 groups genes with a scattered distribution of peaks that span large

336 chromosomal regions and have low enrichment, making them less likely targets. In contrast,  
337 genes in Cluster 2 exhibit a discrete peak with a high amplitude centered at known or predicted  
338 transcription start site (TSS) (Extended data: Fig. 5a). Interestingly, integrative analysis of  
339 RNA-seq and ChIP-seq data showed that genes from Cluster 2 are exclusively expressed in the  
340 pre-gametes and as such match well with genes from Cluster I to IV mined from transcriptome  
341 data (Fig. 1f).

342  
343 To investigate the co-occupancy of AP2XII-1 and its partners, we focused our analysis on  
344 Cluster 2 genes. As predicted, when IAA was added, there was a nearly complete loss of  
345 AP2XI-2 and AP2XII-1 chromatin enrichment compared to the untreated parasites (Fig. 6a).  
346 Overall, the inspection of these individual ChIP-seq tracks revealed a strong overlap between  
347 the binding sites of the AP2XI-2 or AP2XII-1 cistromes (Fig. 6b and Extended Data Fig. 5b),  
348 with approximately 30-50% of the peaks located at the TSS (Extended Data Fig. 5c). AP2XII-  
349 I and AP2XI-2 showed similar genome-wide occupancy when immunoprecipitated from single  
350 or double knockouts (Extended Data Fig. 5d-e, h). We next investigated whether AP2XI-2 and  
351 AP2XII-1 are individually or jointly required for the recruitment of MORC and HDAC3 to  
352 chromatin by examining their genome-wide occupancy in the absence of AP2XI-2 and/or  
353 AP2XII-1. After the addition of IAA and acute depletion of these AP2s, we observed a  
354 concomitant reduction in HDAC3 and MORC occupancy at TSS of cluster 2 genes, which is  
355 even more pronounced in the context of double knockdown (Fig. 6a; Extended Data Fig. 5h).

356  
357 AP2XI-2 and AP2XII-1 are expected to mediate chromatin compaction and accessibility, a  
358 function attributed to their partners MORC and HDAC3. To investigate this assumption, we  
359 performed ATAC-seq (GSE222832), a robust and streamlined method for profiling chromatin  
360 accessibility<sup>35</sup>. ATAC-seq peaks represent regions of chromatin accessible to transposases and  
361 are therefore proxies for transcription factor occupancy on chromatin. At the genome level,  
362 there is a slight decrease in average accessibility between untreated and treated conditions (Fig.  
363 6c) with a majority of the peaks located at TSS (Extended Data Fig. 6a,b). However, when we  
364 plotted ATAC-seq data for the subset of down- and up-regulated genes (as defined in Fig. 1f),  
365 the changes in occupancy were more pronounced and coherent with expected increase or  
366 decrease in accessibility of induced or repressed clusters, respectively (Fig. 6d,e). Additionally,  
367 in many *Toxoplasma* promoters, we observed that two well-positioned nucleosomes upstream  
368 and downstream of TSS define a nucleosome-depleted region (NDR) that serves as a binding  
369 platform for RNA polymerase and transcription factors (Fig. 6e).

370

371 At the gene level, and as exemplified by GRA80, GRA81 and GRA82 profiles, dynamic release  
372 of AP2XI-2 and AP2XII-1 from DNA induced by IAA resulted in a substantial decrease in  
373 MORC/HDAC3 enrichment, which enhanced local chromatin hyperaccessibility and led to a  
374 concomitant increase in mRNA abundance of target genes (Fig. 6f; Extended Data Fig. 6c).  
375 After the addition of IAA, these sites became accessible as they exhibited stronger ATAC-seq  
376 signals, presumably a consequence of MORC and HDAC3 eviction from chromatin. This  
377 regulatory pattern applied to all families of canonical merozoite genes, regardless of whether  
378 they encode proteins destined for organelles or the surface of the parasite (Extended Data Fig.  
379 6c-e). We also observed that this form of control occurred simultaneously for both genes when  
380 they were close to each other and arranged head to head (Fig. 6f). Our findings corroborate the  
381 long-held hypothesis that AP2 transcription factors in Apicomplexa function as molecular  
382 tethers that facilitate the recruitment of chromatin modifiers to specific DNA sequences, which  
383 in turn regulates the degree of transcriptional permissiveness of the parasite genome<sup>9,10,33</sup>.

384

### 385 **Co-depletion of AP2XI-2 and AP2XII-1 induces a downstream network of secondary** 386 **transcriptional regulators to guide merogony.**

387 In our results, we also identified some genes that exhibited high RNA levels and  
388 hyperaccessible chromatin signatures after the addition of IAA, but that lacked the  
389 characteristic recruitment of MORC and HDAC3 to their promoters in the untreated state (e.g.,  
390 PNP, Extended Data Fig. 7a). Conversely, this observation also applies to clusters of tachyzoite  
391 genes that are repressed by the simultaneous depletion of AP2XI-2 and AP2XII-1 (Clusters V  
392 and VI, Fig. 1f). For those genes, a strong decrease in ATAC-seq signals was observed after  
393 the addition of IAA, but no trace of any component of the MORC repressive complex was  
394 detected by ChIP in their environment (Fig. 6f; Extended Data Fig. 7b-d). This suggests that  
395 AP2XI-2- and AP2XII-1 restrict chromatin accessibility in gene regulatory regions via an  
396 indirect mechanism that is not dependent on their DNA-binding activities or their functional  
397 partners MORC and HDAC3. This transcriptional output may originate from secondary  
398 transcription factors, which in turn dictate the setting of a particular predetermined  
399 transcriptional program for a particular stage<sup>1,10</sup>. This hypothesis is supported by the  
400 observation that simultaneous depletion of AP2XI-2 and AP2XII-1 triggers the transcription of  
401 seven AP2 and one C2H2 zinc finger TFs, all of which are controlled by the chromatin  
402 occupancy dynamics of MORC and HDAC3 (Fig. 6g; Extended Data Fig. 8). A relevant  
403 example is AP2IX-1, whose expression is restricted to merozoites and which, when transiently

404 expressed in tachyzoites, has been shown to suppress the expression of SRS29B, which encodes  
405 SAG1, the major surface antigen of tachyzoites<sup>36</sup>. Thus, AP2IX-1 likely acts downstream of  
406 AP2XI-2 and AP2XII-1 (Extended Data Fig. 8e) and, when expressed, contributes to the  
407 restructuring of the SRS repertoire during merogony. Although less frequent in our study, this  
408 second wave of TFs may also operate as transcriptional activators to take over the expression  
409 of pre-sexual genes not directly regulated by AP2XI-2 and AP2XII-1 (e.g., the *PNP* locus;  
410 Extended Data Fig. 7a), indicating that the development to the merozoite stage is subject to an  
411 intricate regulatory cascade.

412

## 413 Discussion

414 Simultaneous depletion of AP2XII-1 and AP2XI-2 is sufficient to initiate the pre-sexual  
415 transcriptional program and silence the tachyzoite determinants in a remarkably more effective  
416 manner than depletion of MORC or inhibition of HDAC3. We were able to produce a large  
417 number of meronts at all developmental stages in cultured cells. Typically, achieving this level  
418 of output would require infecting a significant number of kittens, which poses significant ethical  
419 and technical challenges. This approach allowed us to gain a deeper understanding of the  
420 biology of pre-gametes, an area that has been largely overlooked so far, and to expand upon  
421 what has been inferred from studying other parasites of the same phylum. We provided  
422 compelling evidence that *Toxoplasma* schizonts produced *in vitro*, undergo endopolygony with  
423 karyokinesis during merogony. Compared to other Coccidian parasites phylogenetically related  
424 to *Toxoplasma*, this process of division is similar to the porcine parasite *Cystoisospora suis* but  
425 differs from the endopolygony process without nuclear fission observed in *S. neurona*<sup>30,37</sup>. All  
426 predefined morphotypes (A to E) have been detected over time *in vitro*, including type E  
427 meronts, which are expected to mature into sexual gametes<sup>3</sup>. However, fully differentiated  
428 microgametocytes and macrogametocytes were not observed probably because gamete  
429 formation requires a complex genetic program as in *Plasmodium falciparum*<sup>38,39</sup> or a dedicated  
430 metabolic environment found exclusively in feline enterocytes<sup>40</sup>.

431

432 Merozoites differ markedly from tachyzoites in that they express a much smaller but specific  
433 repertoire of MIC, ROP, and GRA proteins. It is noteworthy that the pregametes have a more  
434 limited host cell range for infection as opposed to tachyzoites, which can invade and develop  
435 in almost any nucleated cells of a warm-blooded host. Accordingly, merozoites that are fully  
436 differentiated *in vitro* are unable to egress, and even when prompted to do so, their ability to

437 glide and infect human fibroblasts is impaired ([Extended Data Fig. 2f](#)). This suggests that these  
438 *in vitro* differentiated merozoites may have a similar migratory ability as those found in infected  
439 cat gut and can move through the gastrointestinal tract and within mucus layers, however, they  
440 lack the capability to invade and spread on fibroblast surfaces as tachyzoites do<sup>12</sup>. This finding  
441 aligns with the remodeling of their surface proteins (e.g., SRS and family A), which have been  
442 proposed to play an important role in gamete recognition and fertilization, similar to  
443 *Plasmodium*'s 6-cys protein family<sup>41</sup>.

444

445 Mechanistically, AP2XII-1 and AP2XI-2 bind cooperatively to DNA as homo- and  
446 heterodimers and selectively recruit HDAC3 and MORC to the promoter of merozoite genes,  
447 which in turn create a non-permissive chromatin environment for transcription in tachyzoites.  
448 In this process, MORC likely forms dimers that topologically entrap DNA loops<sup>42</sup> and support  
449 chromatin condensation through synergistic covalent modification of nucleosomes catalyzed  
450 by its partner, the histone deacetylase HDAC3<sup>1</sup>. Our model was supported by a recent report  
451 showing how MORC proteins condense chromatin, reduce DNA accessibility to TFs, and  
452 thereby repress gene expression in the plant *A. thaliana*<sup>43</sup>. AP2XII-1 and AP2XI-2 co-depletion  
453 also drives hierarchical expression of secondary AP2s, all of which have restricted expression  
454 at pre-sexual stages and likely act as downstream activators or repressors during merogony. In  
455 this hierarchy, AP2IV-3 is singularly conserved in the phylum ([Extended Data Fig. 8b](#)), as it  
456 shares a homologous DNA-binding domain with AP2-G, the major transcriptional regulator of  
457 gametocytogenesis in *P. falciparum*, underscoring a possible convergence of functions within  
458 Apicomplexa. This division of responsibilities between primary and secondary TFs results in a  
459 tailored transcriptional response that promotes the unidirectional nature of the life cycle. We  
460 anticipate that additional AP2s, which may or may not be associated with MORC, are operating  
461 downstream in the parasite life cycle, for example in controlling sex determination. Fine-tuning  
462 the activity of these regulators in mature merozoites grown *in vitro* could pave the way for the  
463 production of functional gametes, opening the doors to *in vitro* fertilization and forward  
464 genetics.

465

## 466 **Methods**

467 **Parasites and human cell cultures.** Human primary fibroblasts (HFFs, ATCC® CCL-171™)  
468 were cultured in Dulbecco's Modified Eagle Medium (DMEM) (Invitrogen) supplemented with  
469 10% heat-inactivated fetal bovine serum (FBS) (Invitrogen), 10 mM (4-(2-hydroxyethyl)-1-

470 piperazine-ethanesulfonic acid) (HEPES) buffer pH 7.2, 2 mM L-glutamine and 50 µg/ml  
471 penicillin and streptomycin (Invitrogen). Cells were incubated at 37°C and 5% CO<sub>2</sub>.  
472 *Toxoplasma* strains used in this study and listed in [Supplementary Table 1](#) were maintained *in*  
473 *vitro* by serial passage on monolayers of HFFs. Cultures were free of mycoplasma as  
474 determined by qualitative PCR.

475

476 **Reagents.** The following primary antibodies were used in the immunofluorescence,  
477 immunoblotting, and/or ChIP assays: rabbit anti-TgHDAC3 (RRID: AB\_2713903), rabbit anti-  
478 TgGAP45 (gift from Pr. Dominique Soldati), mouse anti-HA tag (Roche, RRID: AB\_2314622),  
479 rabbit anti-HA Tag (Cell Signaling Technology, RRID: AB\_1549585), rabbit anti-mCherry  
480 (Cell Signaling Technology, RRID: AB\_2799246), rabbit anti-FLAG (Cell Signaling  
481 Technology, RRID: AB\_2798687), mouse anti-MYC clone 9B11 (RRID: AB\_2148465),  
482 H3K9me3 (Diagenode, RRID: AB\_2616044), rabbit Anti-acetyl-Histone H4, pan (Lys 5,8,12)  
483 (Millipore, RRID:AB\_310270), rat anti-IMC7 (gift from Pr. Gubbels MJ), mouse anti-IMC1  
484 (gift from Pr. Ward GE), mouse anti-AtRx antibody clone 11G8<sup>26</sup>, mouse anti-GRA11b<sup>14</sup>. We  
485 have also raised homemade antibodies against linear peptides in rabbits corresponding to the  
486 following proteins: MORC\_Peptide2 (C+SGAPIWTGERGSGA); AP2XI-2  
487 (C+HAFKTRRTEAAT) TGME49\_273980/GRA80 (C+RPPWAPGAGPEN);  
488 TGME49\_243940/GRA81 (C+QKELAEVAQRALEN); TGME49\_277230/GRA82  
489 (C+SDVNTEGDATVANPE); TGME49\_209985/ROP26 (CQETVQGNGETQL); SRS48  
490 family (CKALIEVKGVPK); SRS59B/K (C+IHVPGTDSTSSGPGS);  
491 TGME49\_314250/BRP1 (C+QVKEGTKNNKGLSDK); TGME49\_307640/CK2 kinase  
492 (C+IRAQYHAYKKGKYSHA); and TGME49\_306455 (C+DGRTPVDRVFEE). They were  
493 manufactured by Eurogentec and used for immunofluorescence, immunoblotting and/or  
494 chromatin immunoprecipitation. Secondary immunofluorescent antibodies were coupled with  
495 Alexa Fluor 488 or Alexa Fluor 594 (Thermo Fisher Scientific). Secondary antibodies used in  
496 Western blotting were conjugated to alkaline phosphatase (Promega) or horseradish peroxidase.

497

498 **Auxin-induced degradation.** Degradation of AP2XII-1- AID-HA, AP2XI-2-mAID- HA, and  
499 AP2XII-1- AID-HA /AP2XI-2-mAID- MYC was achieved with 3-indoleacetic acid (IAA,  
500 Sigma-Aldrich # 45533). A stock of 500 mM IAA dissolved in 100% EtOH at a ratio of 1:1,000  
501 was used to degrade mAID-tagged proteins to a final concentration of 500 µM. The mock  
502 treatment consisted of an equivalent volume of 100% EtOH at a final concentration of 0.0789%  
503 (wt/vol). To monitor the degradation of AID-tagged proteins, parasites grown in HFF

504 monolayers were treated with auxin or ethanol alone for various time intervals at 37 °C. After  
505 treatment, parasites were harvested and analyzed by immunofluorescence or Western blotting.

506

507 **Immunofluorescence microscopy.** *Toxoplasma*-infected HFF cells grown on coverslips were  
508 fixed in 3% formaldehyde for 20 minutes at room temperature, permeabilized with 0.1% (v/v)  
509 Triton X-100 for 15 minutes, and blocked in phosphate buffered saline (PBS) containing 3%  
510 (w/v) BSA. Cells were then incubated with primary antibodies for 1 hour, followed by the  
511 addition of secondary antibodies conjugated to Alexa Fluor 488 or 594 (Molecular Probes).  
512 Nuclei were stained with Hoechst 33258 (2 µg/ml in PBS) for 10 minutes at room temperature.  
513 After washing four times in PBS, coverslips were mounted on a glass slide with Mowiol  
514 mounting medium, and images were acquired with a fluorescence microscope ZEISS  
515 ApoTome.2 and processed with ZEN software (Carl Zeiss, Inc.).

516

517 For IFA of *in vivo* cat stages, small intestines of infected kittens from a previous study<sup>15</sup>  
518 embedded in paraffin were sectioned to 3 µm and dried over night at 37 °C. Deparaffinization  
519 was performed first 3 times 2 min in xylene, washed twice for 1 min in 100% ethanol and finally  
520 rehydrated sequentially 1 min in 96% and 70% ethanol and water. For antigen retrieval, samples  
521 were boiled in a pressure cooker for 20 min in citrate buffer pH 6.1 (Dako Target Retrieval  
522 Solution, S2369) and transferred to water. Cells were permeabilized in 0.3% Triton X-100/PBS  
523 and blocked with FCS. Staining was performed over night at 4 °C using either mouse anti-  
524 GRA11b<sup>14</sup> and rabbit anti-IMC1 (gift from Pr. Dominique Soldati) or rabbit anti-GRA80 with  
525 rat immune serum in 20% FCS/0.3% TritonX-100/PBS. The samples were then washed and  
526 incubated with 1 µg/ml DAPI/20% FCS/0.3% TritonX-100/PBS and either anti-rabbit Alexa  
527 Fluor 488 (Invitrogen, A11070) and anti-mouse Alexa Fluor 594 (Invitrogen, A11005) or anti-  
528 rat Alexa Fluor 488 (Invitrogen, A11006) with anti-rabbit Alexa Fluor 594 (Invitrogen,  
529 A11072) for 1 h at room temperature. After three washes, samples were mounted with  
530 Vectashield and imaged either with a Leica DMI 6000 B epi-fluorescent microscope or a Leica  
531 SP8 confocal microscope. Confocal images were deconvoluted using SVI Huygens  
532 Professional. Maximum intensity projections were performed using FIJI 2.9.1.

533

534 **Transmission electron microscopy.** For ultrastructural observations, *Toxoplasma*-infected  
535 HFF grown as monolayers on a 6-well dish were exposed to 500 µM IAA or ethanol solvent as  
536 described above before fixation 24 hours or 40 hours post-infection in 2.5% glutaraldehyde in  
537 0.1 mM sodium cacodylate (pH7.4) and processed as described previously<sup>44</sup>. Ultrathin sections



538 of infected cells were stained with osmium tetroxide before examination with Hitachi 7600  
539 EM under 80 kV equipped with a dual AMT CCD camera system.

540

541 **Western blot.** Immunoblot analysis of protein was performed as described in [Swale et al.](#)  
542 [\(2022\)](#)<sup>45</sup>. Briefly,  $\sim 10^7$  cells were lysed and sonicated in 50  $\mu$ l lysis buffer (10 mM Tris-HCl,  
543 pH6.8, 0.5% SDS [v/v], 10% glycerol [v/v], 1 mM EDTA, and protease inhibitor cocktail).  
544 Proteins were separated using SDS-PAGE, transferred by liquid transfer to a polyvinylidene  
545 fluoride membrane (Immobilon-P; EMD Millipore), and Western blots probed with the  
546 appropriate primary antibodies and alkaline phosphatase- or horseradish peroxidase-conjugated  
547 secondary goat antibodies. Signals were detected using NBT-BCIP (Amresco) or an enhanced  
548 chemiluminescence system (Thermo Scientific).

549

550 **Plasmid construction.** The plasmids and primers used in this work for the gene of interest  
551 (GOI) are listed in [Supplementary Table 1](#). To construct the vector pLIC- GOI -HAFlag and  
552 pLIC- GOI -mAID- HA or pLIC- GOI -mAID-(MYC)2, the coding sequence of GOI was  
553 amplified with primers LIC-GOI -Fwd and LIC-GOI -Rev using genomic *Toxoplasma* DNA as  
554 template. The resulting PCR product was cloned into the vectors pLIC- HF -dhfr or pLIC-  
555 mCherry-dhfr using the ligation-independent cloning (LIC) method. Specific gRNA for GOI,  
556 based on the CRISPR/cas9 editing method, was cloned into plasmid pTOXO\_Cas9-CRISPR<sup>1</sup>.  
557 Twenty mers oligonucleotides corresponding to specific GOI were cloned using the Golden  
558 Gate strategy. Briefly, the primers GOI -gRNA-Fwd and GOI -gRNA-Rev containing the  
559 sgRNA targeting the genomic sequence GOI were phosphorylated, annealed, and ligated into  
560 the pTOXO\_Cas9-CRISPR plasmid linearized with BsaI, resulting in pTOXO\_Cas9-  
561 CRISPR::sgGOI.

562

563 ***Toxoplasma* transfection.** Parasite strains were electroporated with vectors in Cytomix buffer  
564 (120 mM KCl, 0.15 mM CaCl<sub>2</sub>, 10 mM K<sub>2</sub>HPO<sub>4</sub>/ KH<sub>2</sub>PO<sub>4</sub> pH 7.6, 25 mM HEPES pH7.6, 2  
565 mM EGTA, 5 mM MgCl<sub>2</sub>) using a BTX ECM 630 machine (Harvard Apparatus).  
566 Electroporation was performed in a 2 mm cuvette at 1,100 V, 25  $\Omega$ , and 25  $\mu$ F. Antibiotics  
567 (concentration) used were chloramphenicol (20  $\mu$ M), mycophenolic acid (25  $\mu$ g/ml) with  
568 xanthine (50  $\mu$ g/ml), pyrimethamine (3  $\mu$ M), or 5-fluorodeoxyuracil (10  $\mu$ M) as needed. Stable  
569 transgenic parasites were selected with the appropriate antibiotic, cloned in 96-well plates by  
570 limiting dilution, and verified by immunofluorescence assay or genomic analysis.

571

572 **Chromatographic purification of FLAG tagged proteins.** *Toxoplasma* extracts from  
573 RH $\Delta$ ku80 or Pru $\Delta$ ku80 cells stably expressing HAFlag-tagged AP2XII-1 or AP2XI-2 proteins,  
574 respectively, were incubated with anti-FLAG M2 affinity gel (Sigma-Aldrich) for 1 hour at  
575 4°C. Beads were washed with 10-column volumes of BC500 buffer (20 mM Tris-HCl, pH 8.0,  
576 500 mM KCl, 20% glycerol, 1 mM EDTA, 1 mM DTT, 0.5% NP-40, and protease inhibitors).  
577 Bound polypeptides were eluted stepwise with 250  $\mu$ g/ml FLAG peptide (Sigma Aldrich)  
578 diluted in BC100 buffer. For size-exclusion chromatography, protein eluates were loaded onto  
579 a Superose 6 HR 10/30 column equilibrated with BC500. The flow rate was set at 0.35 ml/min,  
580 and 0.5-ml fractions were collected.

581  
582 **MS-based proteomic analyses of interactomes and SEC fractions.** Protein bands were  
583 excised from colloidal blue stained gels (Thermo Fisher Scientific) before in-gel digestion using  
584 modified trypsin (Promega, sequencing grade) as previously described<sup>1</sup>. Resulting peptides  
585 were analyzed by online nanoliquid chromatography (UltiMate 3000 RSLCnano, Thermo  
586 Scientific) coupled to tandem MS (Q-Exactive Plus, Q-Exactive HF and Orbitrap Exploris 480,  
587 Thermo Scientific, for respectively AP2XI-2 interactome, AP2XII-1 interactome, and SEC  
588 fractions). Peptides were sampled on a 300  $\mu$ m x 5 mm PepMap C18 precolumn and separated  
589 on a 75  $\mu$ m x 250 mm C18 column (Reprosil-Pur 120 C18-AQ, 1.9  $\mu$ m, Dr. Maisch, for AP2XI-  
590 2 interactome, and Aurora, 1.7  $\mu$ m, IonOpticks, for AP2XII-1 interactome and SEC fractions)  
591 using 25-min gradients. MS and MS/MS data were acquired using Xcalibur version 4.0  
592 (Thermo Scientific). Peptides and proteins were identified using Mascot (version 2.8.0) through  
593 concomitant searches against the *Toxoplasma gondii* database (ME49 taxonomy, version 58  
594 downloaded from ToxoDB), the Uniprot database (*Homo sapiens* taxonomy for interactomes  
595 or *Trichoplusia ni* for SEC fractions, 20220527 download), and a homemade database  
596 containing the sequences of classical contaminant proteins found in proteomic analyses (human  
597 keratins, trypsin...). Trypsin/P was chosen as the enzyme and two missed cleavages were  
598 allowed. Precursor and fragment mass error tolerances were set at respectively at 10 and 20  
599 ppm. Peptide modifications allowed during the search were: Carbamidomethyl (C, fixed),  
600 Acetyl (Protein N-term, variable) and Oxidation (M, variable). The Proline software (version  
601 2.2.0) was used for the compilation, grouping, and filtering of the results (conservation of rank  
602 1 peptides, peptide length  $\geq$  6 amino acids, false discovery rate of peptide-spectrum-match  
603 identifications  $<$  1%, and minimum of one specific peptide per identified protein group).  
604 Intensity-based absolute quantification (iBAQ) values were calculated for each protein group  
605 in Proline using MS1 intensities of specific and razor peptides.

606

607 **MS-based quantitative analyses of parasite proteomes.** HFF cells were grown to  
608 confluence, infected with RH AP2XII-1 KD / AP2XI-2 KD strain and treated with IAA for 24h,  
609 32h and 48h or mock-treated. Three biological replicates were prepared and analyzed for each  
610 condition. Proteins were extracted using the Cell lysis buffer (Invitrogen). Seven micrograms  
611 of proteins were then stacked in the top of a 4-12% NuPAGE gel (Invitrogen), stained with  
612 Coomassie blue R-250 (Bio-Rad) before in-gel digestion using modified trypsin (Promega,  
613 sequencing grade) as previously described<sup>1</sup>. The resulting peptides were analyzed by online  
614 nanoliquid chromatography coupled to MS/MS (Ultimate 3000 RSLCnano and Q-Exactive HF,  
615 Thermo Fisher Scientific) using a 360-min gradient. For this, peptides were sampled on a 300  
616  $\mu\text{m} \times 5 \text{ mm}$  PepMap C18 precolumn and separated in a 200 cm  $\mu\text{PAC}$  column  
617 (PharmaFluidics). MS and MS/MS data were acquired using the Xcalibur software version 4.0  
618 (Thermo Scientific). Peptides and proteins were identified by Mascot (version 2.8.0, Matrix  
619 Science) through concomitant searches against the *Toxoplasma gondii* database (ME49  
620 taxonomy, version 58 downloaded from ToxoDB), the Uniprot database (*Homo sapiens*  
621 taxonomy, 20220527 download), and a homemade database containing the sequences of  
622 classical contaminant proteins found in proteomic analyses (human keratins, trypsin...).  
623 Trypsin/P was chosen as the enzyme and two missed cleavages were allowed. Precursor and  
624 fragment mass error tolerances were set at respectively at 10 and 20 ppm. Peptide modifications  
625 allowed during the search were: Carbamidomethyl (C, fixed), Acetyl (Protein N-term, variable)  
626 and Oxidation (M, variable). The Proline software (version 2.2.0) was used for the compilation,  
627 grouping, and filtering of the results (conservation of rank 1 peptides, peptide length  $\geq 6$  amino  
628 acids, false discovery rate of peptide-spectrum-match identifications  $< 1\%$ , and minimum of  
629 one specific peptide per identified protein group). Proline was then used to perform a MS1  
630 label-free quantification of the identified protein groups based on razor and specific peptides.  
631 Statistical analyses were performed using ProStaR<sup>49</sup>. Peptides and proteins identified in the  
632 reverse and contaminant databases or matched to human sequences were discarded. Only  
633 proteins identified by MS/MS in a minimum of two replicates of one condition and quantified  
634 in the three replicates of one condition were conserved. After  $\log_2$  transformation, abundance  
635 values were normalized using the variance stabilizing normalization (vsn) method, before  
636 missing value imputation (SLSA algorithm for partially observed values in the condition and  
637 DetQuantile algorithm for totally absent values in the condition). For comparison of each IAA-  
638 treated conditions to mock-treated condition, statistical testing was conducted with limma,  
639 whereby differentially expressed proteins were selected using a  $\log_2(\text{Fold Change})$  cut-off of 1

640 and a p-value cut-off of 0.01, allowing to reach a false discovery rate inferior to 5% according  
641 to the Benjamini-Hochberg estimator. Proteins found differentially abundant but identified by  
642 MS/MS in less than two replicates, and detected in less than three replicates, in the condition  
643 in which they were found to be more abundant were invalidated (p-value = 1). Protein  
644 abundances measured in the four different conditions were also compared globally by analysis  
645 of variance (ANOVA) using Perseus; q-values were obtained by Benjamini-Hochberg  
646 correction.

647

### 648 **Chromatin immunoprecipitation coupled with illumina sequencing.**

649 *Chromatin immunoprecipitation.* HFF cells were grown to confluence and infected with KD  
650 strains as indicated in the figure legends. Harvested intracellular parasites were cross-linked  
651 with formaldehyde (final concentration 1%) for 8 minutes at room temperature, and cross-  
652 linking was stopped by addition of glycine (final concentration 0.125 M) for 5 minutes at room  
653 temperature. The parasites were lysed in ice-cold lysis buffer A (50 mM HEPES KOH pH7.5,  
654 140 mM NaCl, 1 mM EDTA, 10% glycerol, 0.5% NP -40, 0.125% Triton X-100, protease  
655 inhibitor cocktail) and after centrifugation, cross-linked chromatin was sheared in buffer B (1  
656 mM EDTA pH 8.0, 0.5 mM EGTA pH 8.0, 10 mM Tris pH 8.0, protease inhibitor cocktail) by  
657 sonication with a Diagenode Biorupter. Samples were sonicated for 16 cycles (30 seconds ON  
658 and 30 seconds OFF) to achieve an average size of 200-500 base pairs. Sheared chromatin, 5%  
659 BSA, a protease inhibitor cocktail, 10% Triton X-100, 10% deoxycholate, magnetic beads  
660 coated with DiaMag protein A (Diagenode), and antibodies against epitope tags (HA or MYC)  
661 or the protein of interest (MORC or HDAC3) were used for immunoprecipitation. A rabbit IgG  
662 antiserum served as a control mock. After overnight incubation at 4°C on a rotating wheel,  
663 chromatin-antibody complexes were washed and eluted from the beads using the iDeal ChIP-  
664 seq kit for transcription factors (Diagenode) according to the manufacturer's protocol. Samples  
665 were de-crosslinked by heating for 4 hours at 65 °C. DNA was purified using the IPure kit  
666 (Diagenode) and quantified using Qubit Assays (Thermo Fisher Scientific) according to the  
667 manufacturer's protocol. For ChIP-seq, the purified DNA was used for library preparation and  
668 subsequently sequenced by Arraystar Co (USA).

669 *Library Preparation, Sequencing and Data analysis (Arraystar).* ChIP sequencing libraries  
670 were prepared according to the Illumina protocol Preparing Samples for ChIP Sequencing of  
671 DNA. Library preparation: 10 ng of DNA from each sample was converted to blunt-end  
672 phosphorylated DNA fragments using T4 DNA polymerase, Klenow polymerase, and T4  
673 polymerase (NEB); an 'A' base was added to the 3' end of the blunt-end phosphorylated DNA

674 fragments using the polymerase activity of Klenow (Exo-Minus) polymerase (NEB); Illumina  
675 genomic adapters were ligated to the A-tailed DNA fragments; PCR amplification to enrich the  
676 ligated fragments was performed using Phusion High Fidelity PCR Master Mix with HF Buffer  
677 (Finnzymes Oy). The enriched product of ~200-700 bp was excised from the gel and purified.  
678 Sequencing: the library was denatured with 0.1 M NaOH to generate single-stranded DNA  
679 molecules and loaded into flow cell channels at a concentration of 8 pM and amplified in situ  
680 using TruSeq Rapid SR cluster kit (# GD -402-4001, Illumina). Sequencing was performed at  
681 100 cycles on the Illumina HiSeq 4000 according to the manufacturer's instructions.

682 *Data Analysis.* After the sequencing platform generated the sequencing images, the stages of  
683 image analysis and base calling were performed using Off-Line Basecaller software (OLB  
684 V1.8). After passing Solexa CHASTITY quality filter, the clean reads were aligned to *T. gondii*  
685 reference genome (TGME49) using BOWTIE V2 then converted and sorted using Bamtools.  
686 Aligned reads were used for peak calling of the ChIP enriched peaks using MACS V2.2 with a  
687 cutoff p-value of  $10^{-4}$ . Data visualization: For IGB visualization and gene centered analysis  
688 using Deeptools, MACS2 generated bedgraph files were processed with the following  
689 command: “sort -k1,1 -k2,2n 5\_treat\_pileup.bdg > 5\_treat\_pileup-sorted.bdg” then converted  
690 using the BedGraphToBigWig program (ENCODE project). The Deeptools analysis were  
691 generated using “computeMatrix reference point” with the following parameters (--  
692 minThreshold 2, --binSize 10 and --averageTypeBins sum). Plotprofile or heatmap was then  
693 used with a k-mean clustering when applicable. Inter sample comparison were obtained using  
694 the nf-core chip-seq workflow with standard parameters<sup>46</sup>. From this pipeline, HOMER  
695 (annotatePeaks) was used to analyze peak distribution relative to gene features. All these raw  
696 and processed files can be found at [Series GSE222819](#).

697  
698 **RNA-seq and sequence alignment.** Total RNAs were extracted and purified using TRIzol  
699 (Invitrogen, Carlsbad, CA, USA) and RNeasy Plus Mini Kit (Qiagen). RNA quantity and  
700 quality were measured by NanoDrop 2000 (Thermo Scientific). For each condition, RNAs were  
701 prepared from three biological replicates. RNA integrity was assessed by standard non-  
702 denaturing 1.2% TBE agarose gel electrophoresis. RNA sequencing was performed following  
703 standard Illumina protocols, by Novogene (Cambridge, United Kingdom). Briefly, RNA  
704 quantity, integrity, and purity were determined using the Agilent 5400 Fragment Analyzer  
705 System (Agilent Technologies, Palo Alto, California, USA). The RQN ranged from 7.8 to 10  
706 for all samples, which was considered sufficient. Messenger RNAs (mRNA) were purified from  
707 total RNA using poly-T oligo-attached magnetic beads. After fragmentation, the first strand

708 cDNA was synthesized using random hexamer primers. Then the second strand cDNA was  
709 synthesized using dUTP, instead of dTTP. The directional library was ready after end repair, A-  
710 tailing, adapter ligation, size selection, USER enzyme digestion, amplification, and  
711 purification. The library was checked with Qubit and real-time PCR for quantification and  
712 bioanalyzer for size distribution detection. Quantified libraries will be pooled and sequenced  
713 on Illumina platforms, according to effective library concentration and data amount. The  
714 samples were sequenced on the Illumina NovaSeq platform (2 x 150 bp, strand-specific  
715 sequencing) and generated ~40 million paired-end reads for each sample. The quality of the  
716 raw sequencing reads was assessed using FastQC ([www.bioinformatics.  
717 babraham.ac.uk/projects/fastqc/](http://www.bioinformatics.babraham.ac.uk/projects/fastqc/)) and MultiQC. For the expression data quantification and  
718 normalization, the FASTQ reads were aligned to the ToxoDB-49 build of the *T. gondii* ME49  
719 genome using Subread version 2.0.1 with the following options ‘subread-align -d 50 -D 600 --  
720 sortReadsByCoordinates’. Read counts for each gene were calculated using featureCounts from  
721 the Subread package. Differential expression analysis was conducted using DESeq2 and default  
722 settings within the iDEP.96 web interface<sup>47</sup>. Transcripts were quantified and normalized using  
723 TPMCalculator. The Illumina RNA-seq dataset generated during this study is available at the  
724 National Center for Biotechnology Information (NCBI): [BioProject # PRJNA921935](#).

725  
726 **Nanopore Direct RNA Sequencing (DRS).** The mRNA library preparation followed the SQK-  
727 RNA002 kit (Oxford Nanopore)–recommended protocol, the only modification was the input  
728 mRNA quantity increased from 500 to 1000 ng, and all other consumables and parameters were  
729 standard. Final yields were evaluated using the Qubit HS dsDNA kit (Thermo Fisher Scientific,  
730 Q32851) with minimum RNA preps reaching at least 200 ng. For all conditions, sequencing  
731 was performed on FLO-MIN106 flow cells either using a MinION MK1C or MinION  
732 sequencer. All datasets were subsequently basecalled (high accuracy) with a Guppy version  
733 higher than 5.0.1 with a *Q* score cutoff of >7. Long read alignment was performed by Minimap2  
734 as previously described<sup>48</sup>. Sam files were converted to bam and sorted using Samtools 1.4.  
735 Alignments were converted and sorted using Samtools 1.4.1. For the three described samples,  
736 *Toxoplasma* aligned reads range between 600,000 and 800,000. The Nanopore DRS dataset is  
737 available at the National Center for Biotechnology Information (NCBI): [BioProject #  
738 PRJNA921935](#).

739  
740

741 **Assay for Transposase-Accessible Chromatin with high-throughput sequencing (ATAC-**  
742 **seq).** Intracellular tachyzoites (non-treated or IAA treated for 24h) were prepared using HFF  
743 cells monolayers in a T175 format, which was freshly scrapped, gently homogenised by  
744 pipetting and centrifuged at 500\*g. Prior to initiating the transposition protocol, the pellet was  
745 gently washed with warm dpbs (Life technologies) and resuspended in 500 µl of cold PBS +  
746 protease inhibitor (Diagenode kit). Nuclei preparation, permeabilization, Tn5 transposition and  
747 library preparation was prepared following precisely the Diagenode ATAC-SEQ kit protocol  
748 (C01080002). Nuclei permeabilization was performed on an estimated 100000 tachyzoites by  
749 diluting 10 µl of DPBS cell suspension (from one T175 resuspended in 500 µl) in 240 of DPSB  
750 + protease inhibitor (1/25 dilution). From this dilution, 50 µl were then taken to perform the  
751 transposition reaction. Of note, the permeabilization protocol used a 3 minute 0,02% digitonin  
752 (Promega) exposure. Following the Tn5 reaction, libraries were amplified using the Diagenode  
753 24 UDI kit 1 (ref 01011034) following standard protocol procedures. Libraries were  
754 multiplexed and sequenced on a single Novaseq6000 lane by Fasteris (Genesupport SA) using  
755 2\*50 cycles, generating on average 27 million reads. Following the demultiplexing of raw reads  
756 by bcl2fastq V3, trimming, quality control, alignment to the ME49 reference genome (using  
757 bwa2) and duplicate read merging (using Picard) was performed by the nf-core ATAC-SEQ  
758 pipeline<sup>46</sup>. Data visualization: For IGB visualization and gene centered analysis using  
759 Deeptools, Picard merged bam files were converted to bigWig file format using a bin size of 5  
760 by bamCoverage (Deeptools). The Deeptools analysis were then generated using  
761 “computeMatrix reference point” with the following parameters (--minThreshold 2, --binSize  
762 10 and --averageTypeBins sum). Quantitative analysis of UT vs IAA 24h conditions was  
763 performed by nf-core through a broad peak calling/annotation (MACS2) followed by HOMER  
764 (annotatePeaks) to analyse peak distribution relative to gene features. Reads were counted on  
765 annotated peaks by featureCounts and counts were processed by DeSeq2 to generate global  
766 statistical analysis of peak intensities in between conditions using biological duplicates. All  
767 these raw and processed files can be found at Series [GSE222832](#).

768

769 **Gene synthesis for recombinant co-expression of *TgAP2XI-2* and *TgAp2XII-I*.**  
770 Gene synthesis for all insect cell codon-optimized constructs was provided by GenScript. Both  
771 AP2 genes were cloned within the co-expression donor vector pFastBac dual which accepts two  
772 constructs. The AP2XI-2 expression cassette was derived from the TGME49\_310900 gene with  
773 a fused dual Strep Tag and Tobacco Etch Virus (TEV) site in the N-terminus. AP2XII-1 was  
774 derived from the full length TGME49\_218960 gene with an additional non-cleavable FLAG-

775 TAG on the C-terminus. The AP2XI-2 expression cassette was under the polyhedrin promoter  
776 while AP2XII-1 was under the P10 promoter.

777 **Generation of baculovirus.** Bacmid cloning steps and baculovirus generation were performed  
778 using EMBAcY baculovirus (gifted by I. Berger), which contains a yellow fluorescent protein  
779 reporter gene in the virus backbone. The established standard cloning and transfection protocols  
780 set up within the EMBL Grenoble eukaryotic expression facility were used. Although  
781 baculovirus synthesis (V0) and amplification (to V1) were performed with SF21 cells cultured  
782 in SF900 III medium (Life Technologies), large-scale expression cultures were performed with  
783 Hi-5 cells cultured in the protein free ESF 921 Insect Cell Culture Medium (Expression System)  
784 and infected with 0.8-1.0% (v/v) of generation 2 (V1) baculovirus suspensions and harvested  
785 72 hours after infection.

786 **Strep-TEV-AP2XI-2/AP2XII-1-flag expression and purification.** For purification, three cell  
787 pellets of about 500 ml of Hi-5 culture were each resuspended in 50 ml of lysis buffer [50 mM  
788 tris (pH 8.0), 400 mM NaCl, and 2 mM b-mercaptoethanol (BME)] in the presence of an anti-  
789 protease cocktail (Complete EDTA-free, Roche) and 1 µl of benzonase (Merck Millipore,  
790 70746). Lysis was performed on ice by sonication for 3 min (30-s on/ 30-s off, 45° amplitude).  
791 After the lysis step, 10% of glycerol was added. Clarification was then performed by  
792 centrifugation for 1 hour at 12,000g and 4°C and vacuum filtration using 45µm nylon filter  
793 systems (SteriFlip - Merck Millipore). Prior to purification, tetrameric avidin (Biolock - IBA  
794 lifescience) was added to the clarified lysate (1/1000 v/v) which was then batch incubated for  
795 20 minutes with 3 ml of Strep-Tactin XT (IBA lifescience). Following the incubation, the resin  
796 was retained on a glass column and washed using 10 ml of lysis buffer. The elution was then  
797 performed using 1X BXT buffer (IBA lifescience) which contains 50 mM biotin, 100 mM Tris  
798 pH 8 and 150 mM NaCl. This initial 1X solution was further supplemented with 300 mM NaCl,  
799 2 mM BME and 10 % glycerol. Following Strep-Tactin XT elution, the sample was  
800 concentrated to 500 µl using a 100 kDa concentrator (Amicon Ultra 4 - Merck Millipore)  
801 injected on an ÄKTA pure FPLC using a Superose 6 increase column 10/300 GL (Cytiva)  
802 running in 50 mM Tris pH :8, 400 mM NaCl, 1 mM BME.

803

804 **Software and Statistical analyses.** Volcano plots, scatter plots, and histograms were generated  
805 with Prism 7. Sample sizes were not predetermined and chosen according to previous literature.  
806 Experiments were performed in biological replicates and provided consistent statistically



807 relevant results. No method of randomization was used. All experiments were performed in  
808 independent biological replicates as stated for each experiment in the manuscript. All  
809 corresponding treatment and control samples from ChIP-seq and RNA-seq were processed at  
810 the same time to minimize technical variation. Investigators were not blinded during the  
811 experiments.

812

813 **Ethics statement.** Animal experiments were performed under the direct supervision of a  
814 veterinary specialist, and according to Swiss law and guidelines on Animal Welfare and the  
815 specific regulations of the Canton of Zurich under permit numbers 130/2012 and 019/2016, as  
816 approved by the Veterinary Office and the Ethics Committee of the Canton of Zurich  
817 (Kantonaes Veterinäramt Zürich, Zollstrasse 20, 8090 Zürich, Switzerland).

818

### 819 **Data availability**

820 Correspondence and requests for materials should be addressed to M.A.H. Nanopore and  
821 Illumina RNA Sequencing data that support the findings of this study have been deposited under  
822 the **BioProject number PRJNA921935**. The ChIPseq and ATAC-seq data have been deposited  
823 to the GEO Datasets under accession number **GSE222819** and **GSE222832**, respectively. The  
824 MS proteomics data have been uploaded to the ProteomeXchange Consortium via the PRIDE  
825 partner repository with the dataset identifiers **PXD039400** and **PXD039390** for respectively the  
826 proteome-wide and interactome analyses. Processed proteomics data is available in  
827 **Supplementary Table 3**.

828

### 829 **Acknowledgments**

830 We are grateful to the developers of the ToxoDB.org Genome Resource. ToxoDB and  
831 EuPathDB are part of the National Institutes of Health/National Institutes of Allergy and  
832 Infectious Diseases (NIH/NIAID)-funded Bioinformatics Resource Center. We thank the  
833 excellent technical staff of the Electron Microscopy Core Facility at the Johns Hopkins  
834 University School of Medicine Microscopy Facility. This work was supported by the  
835 Laboratoire d'Excellence (LabEx) ParaFrap [ANR-11-LABX-0024], the Agence Nationale  
836 pour la Recherche [Project HostQuest, ANR-18-CE15-0023], [Project ApiNewDrug, ANR-21-  
837 CE35-0010-01], [Project ApiMORCing, ANR-21-CE15-0002-01], and Fondation pour la  
838 Recherche Médicale [FRM Equipe, EQU202103012571]. I.C. was supported by a NIH grant  
839 [R01 AI060767]. MS-based proteomic experiments were partially supported by Agence

840 Nationale de la Recherche under projects ProFI (Proteomics French Infrastructure, ANR-10-  
841 INBS-08) and GRAL, a program from the Chemistry Biology Health (CBH) Graduate School  
842 of University Grenoble Alpes (ANR-17-EURE-0003). We express our gratitude to Pr. Gubbels  
843 MJ for his generous donation of antibodies, including the rat anti-IMC7.

844

### 845 **Author Contributions**

846 M.-A.H. supervised the research and coordinated the collaboration. A-V.A. M.S., C.S., D.C.F.,  
847 A.B., D.C., C.C., and M.-A.H. designed, performed and interpreted the experimental work.  
848 Specifically, Y.C. and C.B. performed the mass spectrometric analyzes. IC performed and  
849 interpreted TEM. C.R. and A.B.H. performed confocal microscopy of infected cat mucosa. M.-  
850 A.H., wrote the paper with editorial support from I.C. and comments from all other authors.

851

### 852 **Declaration of Interests**

853 The authors declare no competing interests.

854

### 855 **References**

- 856 1. Farhat, D. C. et al. A MORC-driven transcriptional switch controls *Toxoplasma*  
857 developmental trajectories and sexual commitment. *Nat Microbiol.* 5, 570-583 (2020).
- 858 2. Frenkel, J. K. et al. *Toxoplasma gondii* in cats: fecal stages identified as coccidian oocysts.  
859 *Science.* 167, 893-896 (1970).
- 860 3. Hutchison, W. M. et al. The life cycle of the coccidian parasite, *Toxoplasma gondii*, in the  
861 domestic cat. *Trans. R. Soc. Trop. Med. Hyg.* 65, 380–398 (1971).
- 862 4. Colley, F. C. & Zaman, V. Observations on the endogenous stages of *Toxoplasma gondii* in  
863 the cat ileum. II. Electron microscope study. *Southeast Asian J. Trop. Med. Public Health* 1,  
864 465–480 (1970).
- 865 5. Melton, M. L. & Sheffield, H. G. *Toxoplasma gondii*: the oocyst, sporozoite, and infection  
866 of cultured cells. *Science* 167, 892–893 (1970).
- 867 6. Pelster, B. & Piekarski, G. Elektronenmikroskopische Analyse der  
868 Mikrogametenentwicklung bei *Toxoplasma gondii*. *Z. Parasitenkd.* 37, 267– 277 (1971).
- 869 7. Frenkel, J. & Dubey, J. Toxoplasmosis and its prevention in cats and man. *J. Infect. Dis.* 126,  
870 664–673 (1972).

- 871 8. Ferguson, D. J. et al. Ultrastructural study of early stages of asexual multiplication and  
872 microgametogony of *Toxoplasma gondii* in the small intestine of the cat. *Acta Pathol Microbiol*  
873 *Scand B Microbiol Immunol.* 82, 167-81 (1974).
- 874 9. Kim, K. The epigenome, cell cycle, and development in *Toxoplasma*. *Annu. Rev. Microbiol.*  
875 72, 479–499 (2018).
- 876 10. Farhat, D. C. & Hakimi, M. A. The developmental trajectories of *Toxoplasma* stem from  
877 an elaborate epigenetic rewiring. *Trends Parasitol.* 38, 37-53 (2022).
- 878 11. Behnke, M. S. et al. *Toxoplasma gondii* merozoite gene expression analysis with  
879 comparison to the life cycle discloses a unique expression state during enteric development.  
880 *BMC Genomics.* 15, 350 (2014).
- 881 12. Hehl, A. B. et al. Asexual expansion of *Toxoplasma gondii* merozoites is distinct from  
882 tachyzoites and entails expression of non-overlapping gene families to attach, invade, and  
883 replicate within feline enterocytes. *BMC Genomics.* 16, 66 (2015).
- 884 13. Josling, G. A. et al. Regulation of Sexual Commitment and Gametocytogenesis in Malaria  
885 Parasites. *Annu Rev Microbiol.* 72, 501-519 (2018).
- 886 14. Ramakrishnan, C. et al. The merozoite-specific protein, TgGRA11B, identified as a  
887 component of the *Toxoplasma gondii* parasitophorous vacuole in a tachyzoite expression  
888 model. *Int J Parasitol.* 47, 597-600 (2017).
- 889 15. Ramakrishnan, C. et al. An experimental genetically attenuated live vaccine to prevent  
890 transmission of *Toxoplasma gondii* by cats. *Sci Rep.* 9, 1474 (2019).
- 891 16. Cova, M. M. et al. How Apicomplexa Parasites Secrete and Build Their Invasion  
892 Machinery. *Annu Rev Microbiol.* 76, 619-640 (2022).
- 893 17. Hakimi, M. A. Epigenetic Reprogramming in Host-Parasite Coevolution: The *Toxoplasma*  
894 Paradigm. *Annu Rev Microbiol.* 76, 135-155 (2022).
- 895 18. Ferguson, D. J. et al. The expression and distribution of dense granule proteins in the enteric  
896 (Coccidian) forms of *Toxoplasma gondii* in the small intestine of the cat. *Exp Parasitol.* 91,  
897 203-11 (1999).
- 898 19. Ferguson, D. J. Use of molecular and ultrastructural markers to evaluate stage conversion  
899 of *Toxoplasma gondii* in both the intermediate and definitive host. *Int J Parasitol.* 34, 347-60  
900 (2004).
- 901 20. Schwarz JA et al. A novel rhoptry protein in *Toxoplasma gondii* bradyzoites and  
902 merozoites. *Mol Biochem Parasitol.* 144,159-66 (2005).
- 903 21. Dubey, J. P. & Frenkel, J. K. Cyst-induced toxoplasmosis in cats. *J. Protozool.* 19, 155–177  
904 (1972).

- 905 22. Dubey, J. P. et al. Structures of *Toxoplasma gondii* tachyzoites, bradyzoites, and  
906 sporozoites and biology and development of tissue cysts. *Clin Microbiol Rev.* 11, 267-99  
907 (1998).
- 908 23. Speer, C. A. & Dubey, J. P. Ultrastructural differentiation of *Toxoplasma gondii* schizonts  
909 (types B to E) and gamonts in the intestines of cats fed bradyzoites. *Int J Parasitol.* 35, 193-206  
910 (2005).
- 911 24. Ferguson, D. J. and Dubremetz, J. F. The ultrastructure of *Toxoplasma gondii*. In: Weiss,  
912 L.M., Kim, K. (Eds.), *Toxoplasma gondii, the Model Apicomplexan - Perspectives and*  
913 *Methods.* 3rd ed. Academic Press, London, U. K., pp. 21–61 (2020).
- 914 25. Dubey, R. et al. Differential Roles for Inner Membrane Complex Proteins across  
915 *Toxoplasma gondii* and *Sarcocystis neurona* Development. *mSphere.* 2, e00409-17 (2017).
- 916 26. DeRocher, A. E. et al. A thioredoxin family protein of the apicoplast periphery identifies  
917 abundant candidate transport vesicles in *Toxoplasma gondii*. *Eukaryot Cell.* 7, 1518-29 (2008).
- 918 27. Ferguson, D. J. et al. Maternal inheritance and stage-specific variation of the apicoplast in  
919 *Toxoplasma gondii* during development in the intermediate and definitive host. *Eukaryot Cell.*  
920 4, 814-26 (2005).
- 921 28. Piekarski, G. et al. Endopolygeny in *Toxoplasma gondii*. *Z Parasitenkd.* 36, 122-30 (1971).
- 922 29. Dubey, J. P. & Ferguson, D. J. Life Cycle of *Hammondia hammondi* (Apicomplexa:  
923 Sarcocystidae) in Cats. *J Eukaryot Microbiol.* 62, 346-52 (2015).
- 924 30. Ferguson, D. J. et al. MORN1 has a conserved role in asexual and sexual development  
925 across the apicomplexa. *Eukaryot Cell.* 7, 698-711 (2008).
- 926 31. Dubremetz, J. F. & Ferguson, D. J. The role played by electron microscopy in advancing  
927 our understanding of *Toxoplasma gondii* and other apicomplexans. *Int J Parasitol.* 39, 883-93  
928 (2009).
- 929 32. Wang, Y. et al. *Toxoplasma* Mechanisms for Delivery of Proteins and Uptake of Nutrients  
930 Across the Host-Pathogen Interface. *Annu Rev Microbiol.* 74, 567-586 (2020).
- 931 33. Bougdour, A. et al. Chromatin modifications: implications in the regulation of gene  
932 expression in *Toxoplasma gondii*. *Cell Microbiol.* 12, 413-23 (2010).
- 933 34. Lindner, S. E. et al. Structural determinants of DNA binding by a *P. falciparum* ApiAP2  
934 transcriptional regulator. *J Mol Biol* 395, 558–567 (2009).
- 935 35. Buenrostro, J. D. et al. Transposition of native chromatin for fast and sensitive epigenomic  
936 profiling of open chromatin, DNA-binding proteins and nucleosome position. *Nat Methods.* 10,  
937 1213-8 (2013).

- 938 36. Xue, Y. et al. A single-parasite transcriptional atlas of *Toxoplasma Gondii* reveals novel  
939 control of antigen expression. *Elife*. 9, e54129 (2020).
- 940 37. Gubbels, M. J. et al. Fussing About Fission: Defining Variety Among Mainstream and  
941 Exotic Apicomplexan Cell Division Modes. *Front Cell Infect Microbiol*. 10, 269 (2020).
- 942 38. Gomes, A. R. et al. A transcriptional switch controls sex determination in *Plasmodium*  
943 *falciparum*. *Nature*. 612, 528-533 (2022).
- 944 39. Russell, A. J. C. et al. Regulators of male and female sexual development are critical for the  
945 transmission of a malaria parasite. *Cell Host & Microbe* 31, 1–15 (2023).
- 946 40. Martorelli Di Genova B. et al. Intestinal delta-6-desaturase activity determines host range  
947 for *Toxoplasma* sexual reproduction. *PLoS Biol*. 17, e3000364 (2019).
- 948 41. Van Dijk, M.R. et al. Three members of the 6-cys protein family of *Plasmodium* play a role  
949 in gamete fertility. *PLoS Pathog*. 6, e1000853 (2010).
- 950 42. Kim, H. et al. The Gene-Silencing Protein MORC-1 Topologically Entraps DNA and Forms  
951 Multimeric Assemblies to Cause DNA Compaction. *Mol Cell*. 75, 700-710.e6 (2019).
- 952 43. Zhong, Z. et al. MORC proteins regulate transcription factor binding by mediating  
953 chromatin compaction in active chromatin regions. doi:  
954 <https://doi.org/10.1101/2022.11.01.514783>.
- 955 44. Coppens, I. & Joiner, K. A. Host but not parasite cholesterol controls *Toxoplasma* cell entry  
956 by modulating organelle discharge. *Mol Biol Cell*. 14, 3804-20 (2003).
- 957 45. Swale, C. et al. Altiratinib blocks *Toxoplasma gondii* and *Plasmodium falciparum*  
958 development by selectively targeting a spliceosome kinase. *Sci Transl Med*. 14, eabn3231  
959 (2022).
- 960 46. Ewels, P. A. et al. The nf-core framework for community-curated bioinformatics pipelines.  
961 *Nat Biotechnol*. 38, 276-278 (2020).
- 962 47. Ge, S. X. et al. 2018. iDEP: an integrated web application for differential expression and  
963 pathway analysis of RNA-Seq data. *BMC Bioinformatics* 19, 534.
- 964 48. Farhat, D. C. et al. A plant-like mechanism coupling m6A reading to polyadenylation  
965 safeguards transcriptome integrity and developmental gene partitioning in *Toxoplasma*. *Elife*.  
966 10, e68312 (2021).
- 967
- 968
- 969
- 970

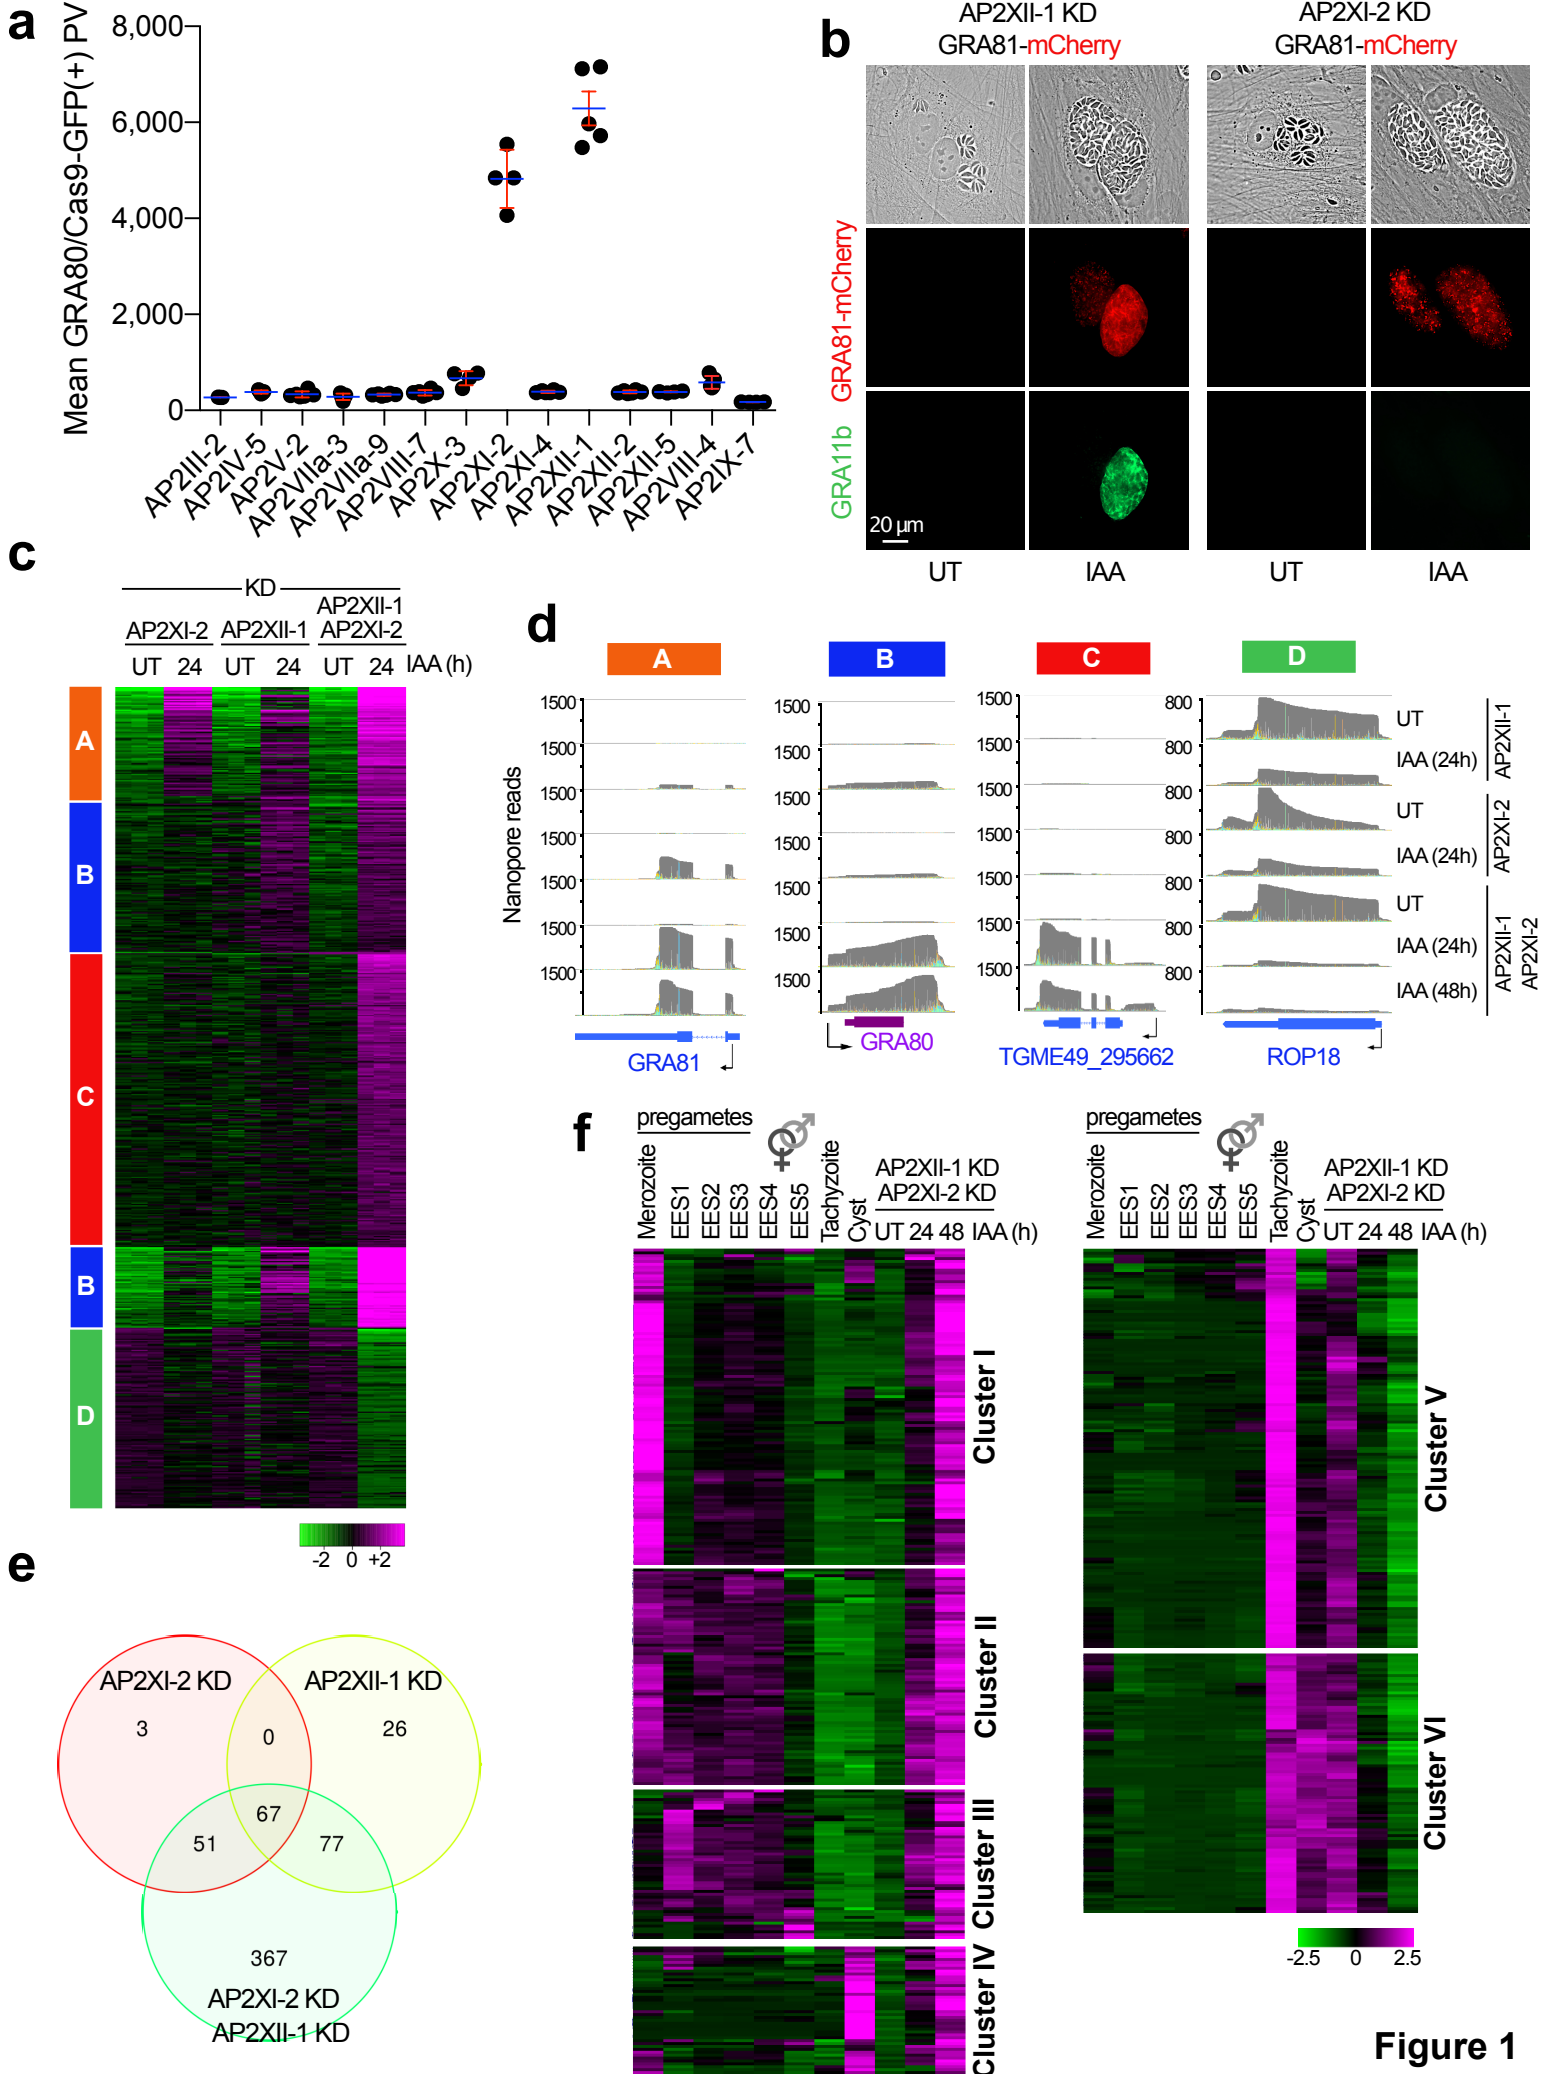

Figure 1

**Fig. 1 | Simultaneous depletion of AP2XI-2 and AP2XII-1 induces the expression of merozoite-restricted transcripts.** **a**, Expression of the merozoite marker GRA80 (*TGME49\_273980*) was quantified *in situ* in intracellular zoites in which one of 14 MORC-associated AP2 was genetically disrupted. Cas9-GFP expression was used to assess the efficacy of genetic disruption in Cas9-expressing parasites (see [Extended Data Fig. 1c](#)). Horizontal bars represent the mean  $\pm$  s.d. of GRA80 vacuolar intensity from three to four independent experiments ( $n = 50$  GFP-positive vacuoles per dot). **b**, IFA of HFFs infected with parasites harboring a reporter gene (*TGME49\_243940*) expressing GRA81, a merozoite protein endogenously tagged with mCherry within the RH AP2XII-1-mAID-HA or AP2XI-2-mAID-HA lineages. Untreated (UT) and IAA-treated zoites were probed with antibodies against GRA11b (green) and mCherry (red). **c**, Heat map of K-Means clustering (Pearson correlation) of 1500 variably expressed genes in three KD context. RPKM values were log<sub>2</sub>-transformed and mean centered then clustered using iDEP.96. Genes were grouped into four clusters on the basis of the expression similarity. **d**, M-pileup representation of aligned Nanopore reads at genes identified as up- or down-regulated in clusters A, B, C, or D after IAA-dependent knockdown of AP2XII-1 and AP2XI-2 individually or together. **e**, Venn diagram showing the overlap of genes that were upregulated in the three knockdown strains treated with IAA. **f**, Heat map of K-Means clustering (Pearson correlation) of 352 and 432 up- and down-regulated genes after simultaneous depletion of AP2XII-1 and AP2XI-2. RPKM values were log<sub>2</sub>-transformed and mean centered then clustered using iDEP.96 ([Ge et al., 2018](#)). Shown is the abundance of each transcript before and after depletion and during different life cycle stages, with data from transcriptomes of merozoites, longitudinal studies of enteroepithelial stages (EES1 to EES5), tachyzoites, and cysts published in [ToxoDB.org](https://toxodb.org). The color scale indicates log<sub>2</sub>-transformed fold changes.

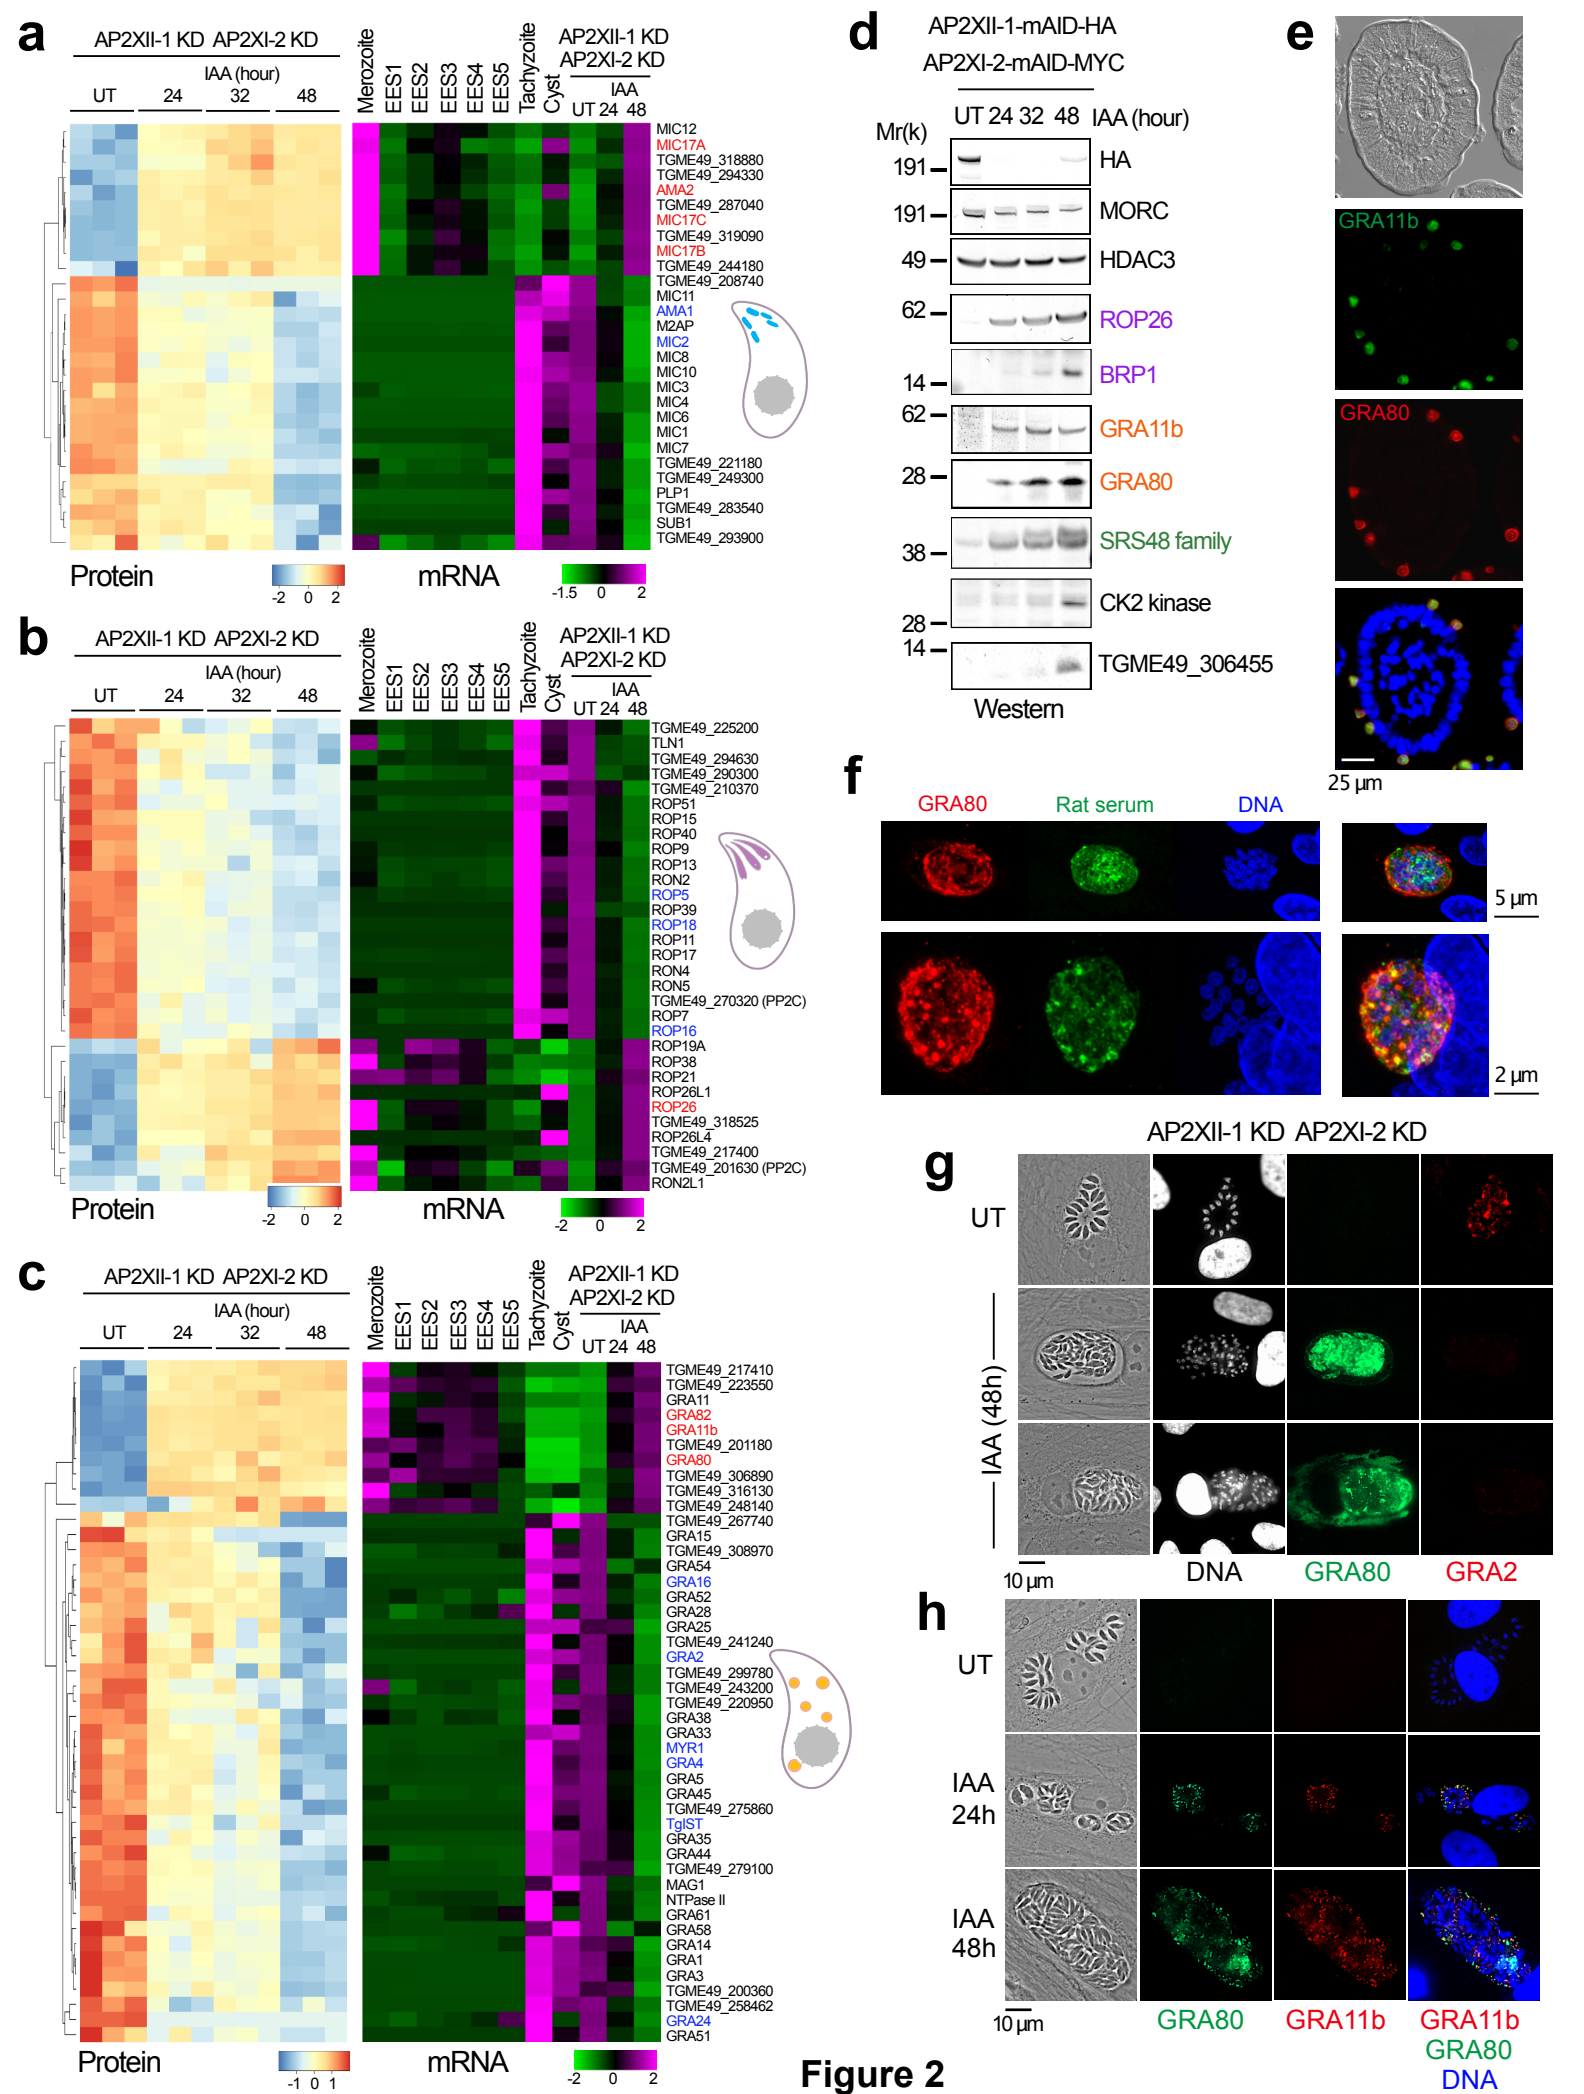



**Fig. 2 | Co-depletion of AP2XI-2 and AP2XII-1 causes rewiring of organellar proteomes specialized in invasion and host-parasite interaction.** **a-c**, Heat map showing hierarchical clustering analysis (Pearson correlation) of selected rhoptry (**a**), dense granule (**b**) and microneme (**c**) mRNA transcripts and their corresponding proteins differentially regulated after simultaneous and conditional depletion of AP2XII-1 and AP2XI-2. Shown is the abundance of their transcripts at different developmental stages, namely tachyzoite, cyst, merozoite, and EES. The color scale indicates the log<sub>2</sub>-transformed fold changes. The genes of interest are highlighted in red. **d**, Time-course western blot analysis of protein expression levels after depletion of AP2XII-1-mAID- HA and AP2XI-2-mAID- MYC. Samples were collected at the indicated time points after addition of IAA and probed with antibodies against HA, MORC, and HDAC3, rhoptry proteins (ROP26 and BRP1), dense granule proteins (GRA11b and GRA80), the SRS48 family, a CK2 kinase (*TGME49\_307640*), and the protein encoded by *TGME49\_306455*. The experiment was repeated three times and a representative blot is shown. **e**, Epifluorescence image of IFA of infected small intestine of kittens stained with antibodies against GRA80 (red) and rat immune serum (green). Nuclei were counterstained with DAPI. **f**, Maximal intensity projection of confocal stacks after IFA with antibodies against GRA80 (red) and rat immune serum (green). Nuclei were counterstained with DAPI. **g**, Expression of tachyzoite protein GRA2 (red) and merozoite protein GRA80 (green) after knockdown of AP2XII-1 and AP2XI-2 was measured by IFA. **h**, Expression of merozoite proteins GRA11b (red) and GRA80 (green) was measured by IFA 24 and 48 hours after addition of IAA. Cells were co-stained with Hoechst DNA-specific dye.

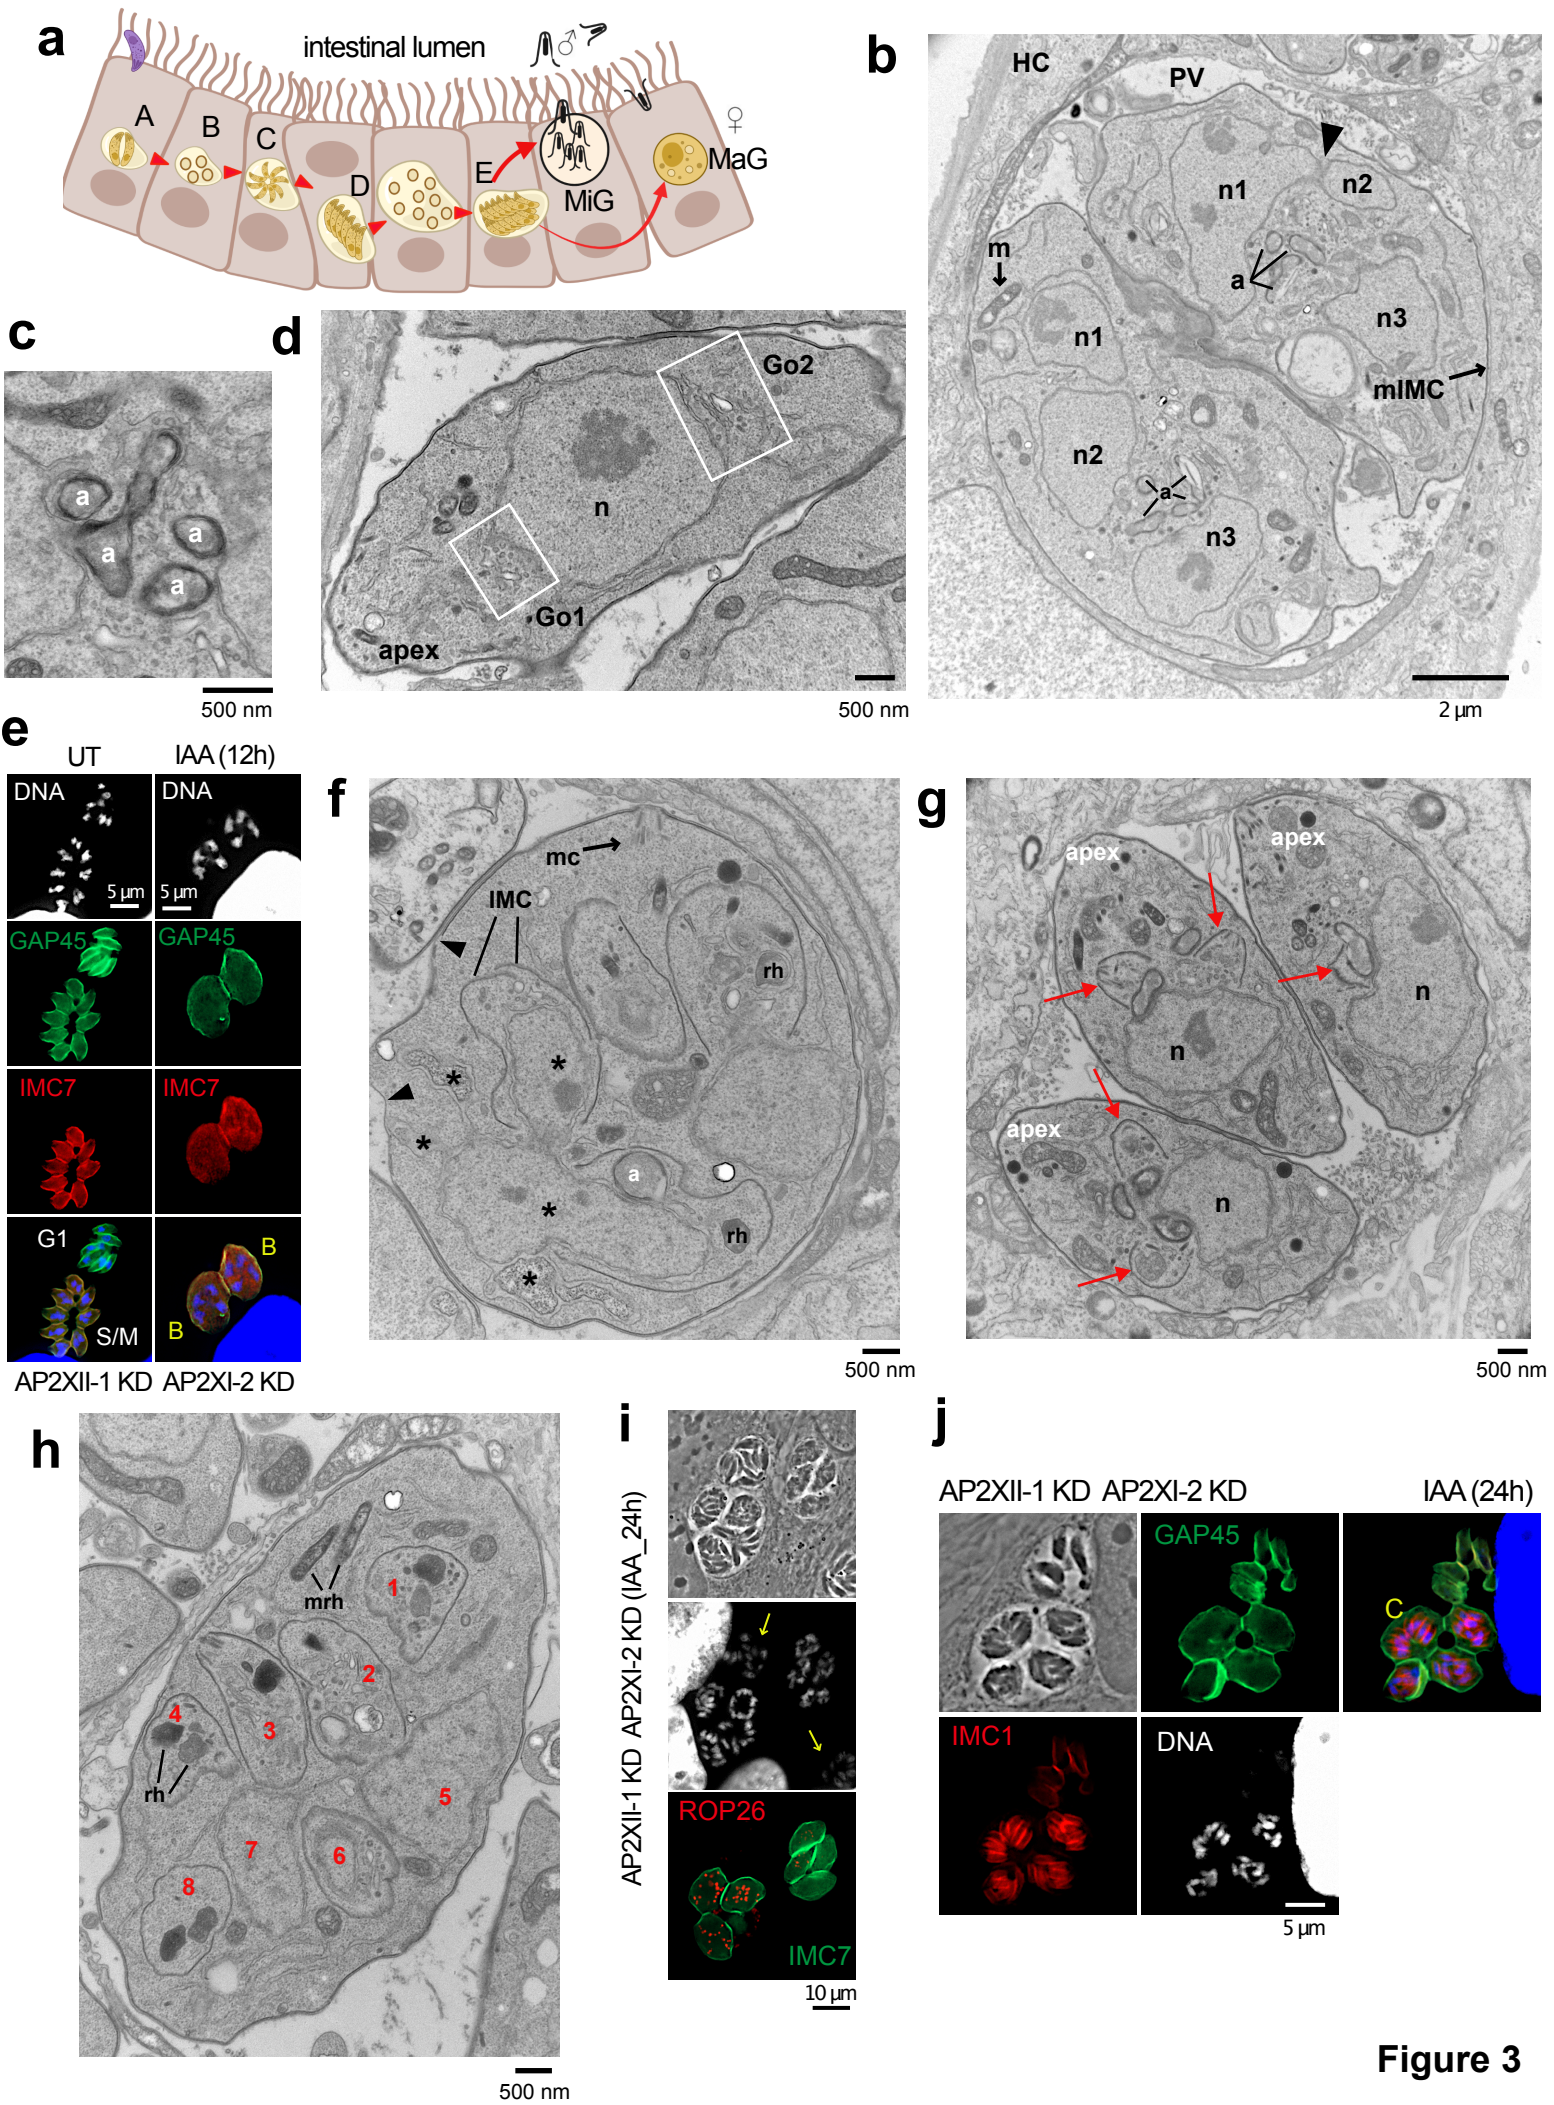

**Figure 3**

**Fig. 3 | AP2XI-2/AP2XII-1-depleted zoites undergo endopolygony with karyokinesis.** **a**, Cartoon showing the merogony process along the intestinal tract. Bradyzoites (in pink) sequentially differentiate into merozoites A-E before giving rise to macro-gametes (MaG) and micro-gametes (MiG). Electron micrograph images of RH (AP2XII-1 KD/AP2XI-2 KD)-infected HFFs untreated (**g**) or treated for 24 hours with IAA (**b-d, f, h**). **b**, Emphasis on karyokinesis with fission. n1 to n3: nuclear profiles, a: apicoplast, m: mitochondrion, mIMC: mother inner membrane complex, hcell: host cell, PV: parasitophorous vacuole. Arrowhead shows nuclear fission. **c**, Emphasis on apicoplast multiplication by growth and scission. **d**, Emphasis on Golgi multiplication from either side of the nucleus. Go1 and Go2: 2 Golgi apparatus. **e**, IFA of tachyzoites (UT) and AP2XII-1/AP2XI-2-depleted zoites (12 hours post-IAA). GAP45 stains the mother cell and its progeny. IMC7 specifically stains the diploid (left) and polyploid (right) mother cell. Cells were stained with Hoechst DNA-specific dye. Types B, meronts are marked in yellow. **f**, Emphasis on appearance and role of the IMC segregating daughter buds in the mother cytoplasm. mc: mother conoid, a: apicoplast, IMC: inner membrane complex, rh: rhoptry. Arrowhead shows area devoid of the IMC and asterisks highlight the nuclear fissions. **g**, Emphasis on contrasting endodyogeny in tachyzoites (untreated condition). Two daughter buds formed apically and symmetrically (arrows). **h**, Emphasis on endopolygony showing up to 8 daughters buds and ultrastructure of rhoptries. rh: rhoptry, mrh: mother rhoptry. **i-j**, AP2XII-1/AP2XI-2-depleted meronts (24 hours post-IAA) were fixed and stained with ROP26 (*TGME49\_209985*) or IMC1 (red), IMC7 (green) and Hoechst DNA-specific dye (white or blue). Yellow arrows indicate IMC7-negative mature merozoites and type C meronts are shown.

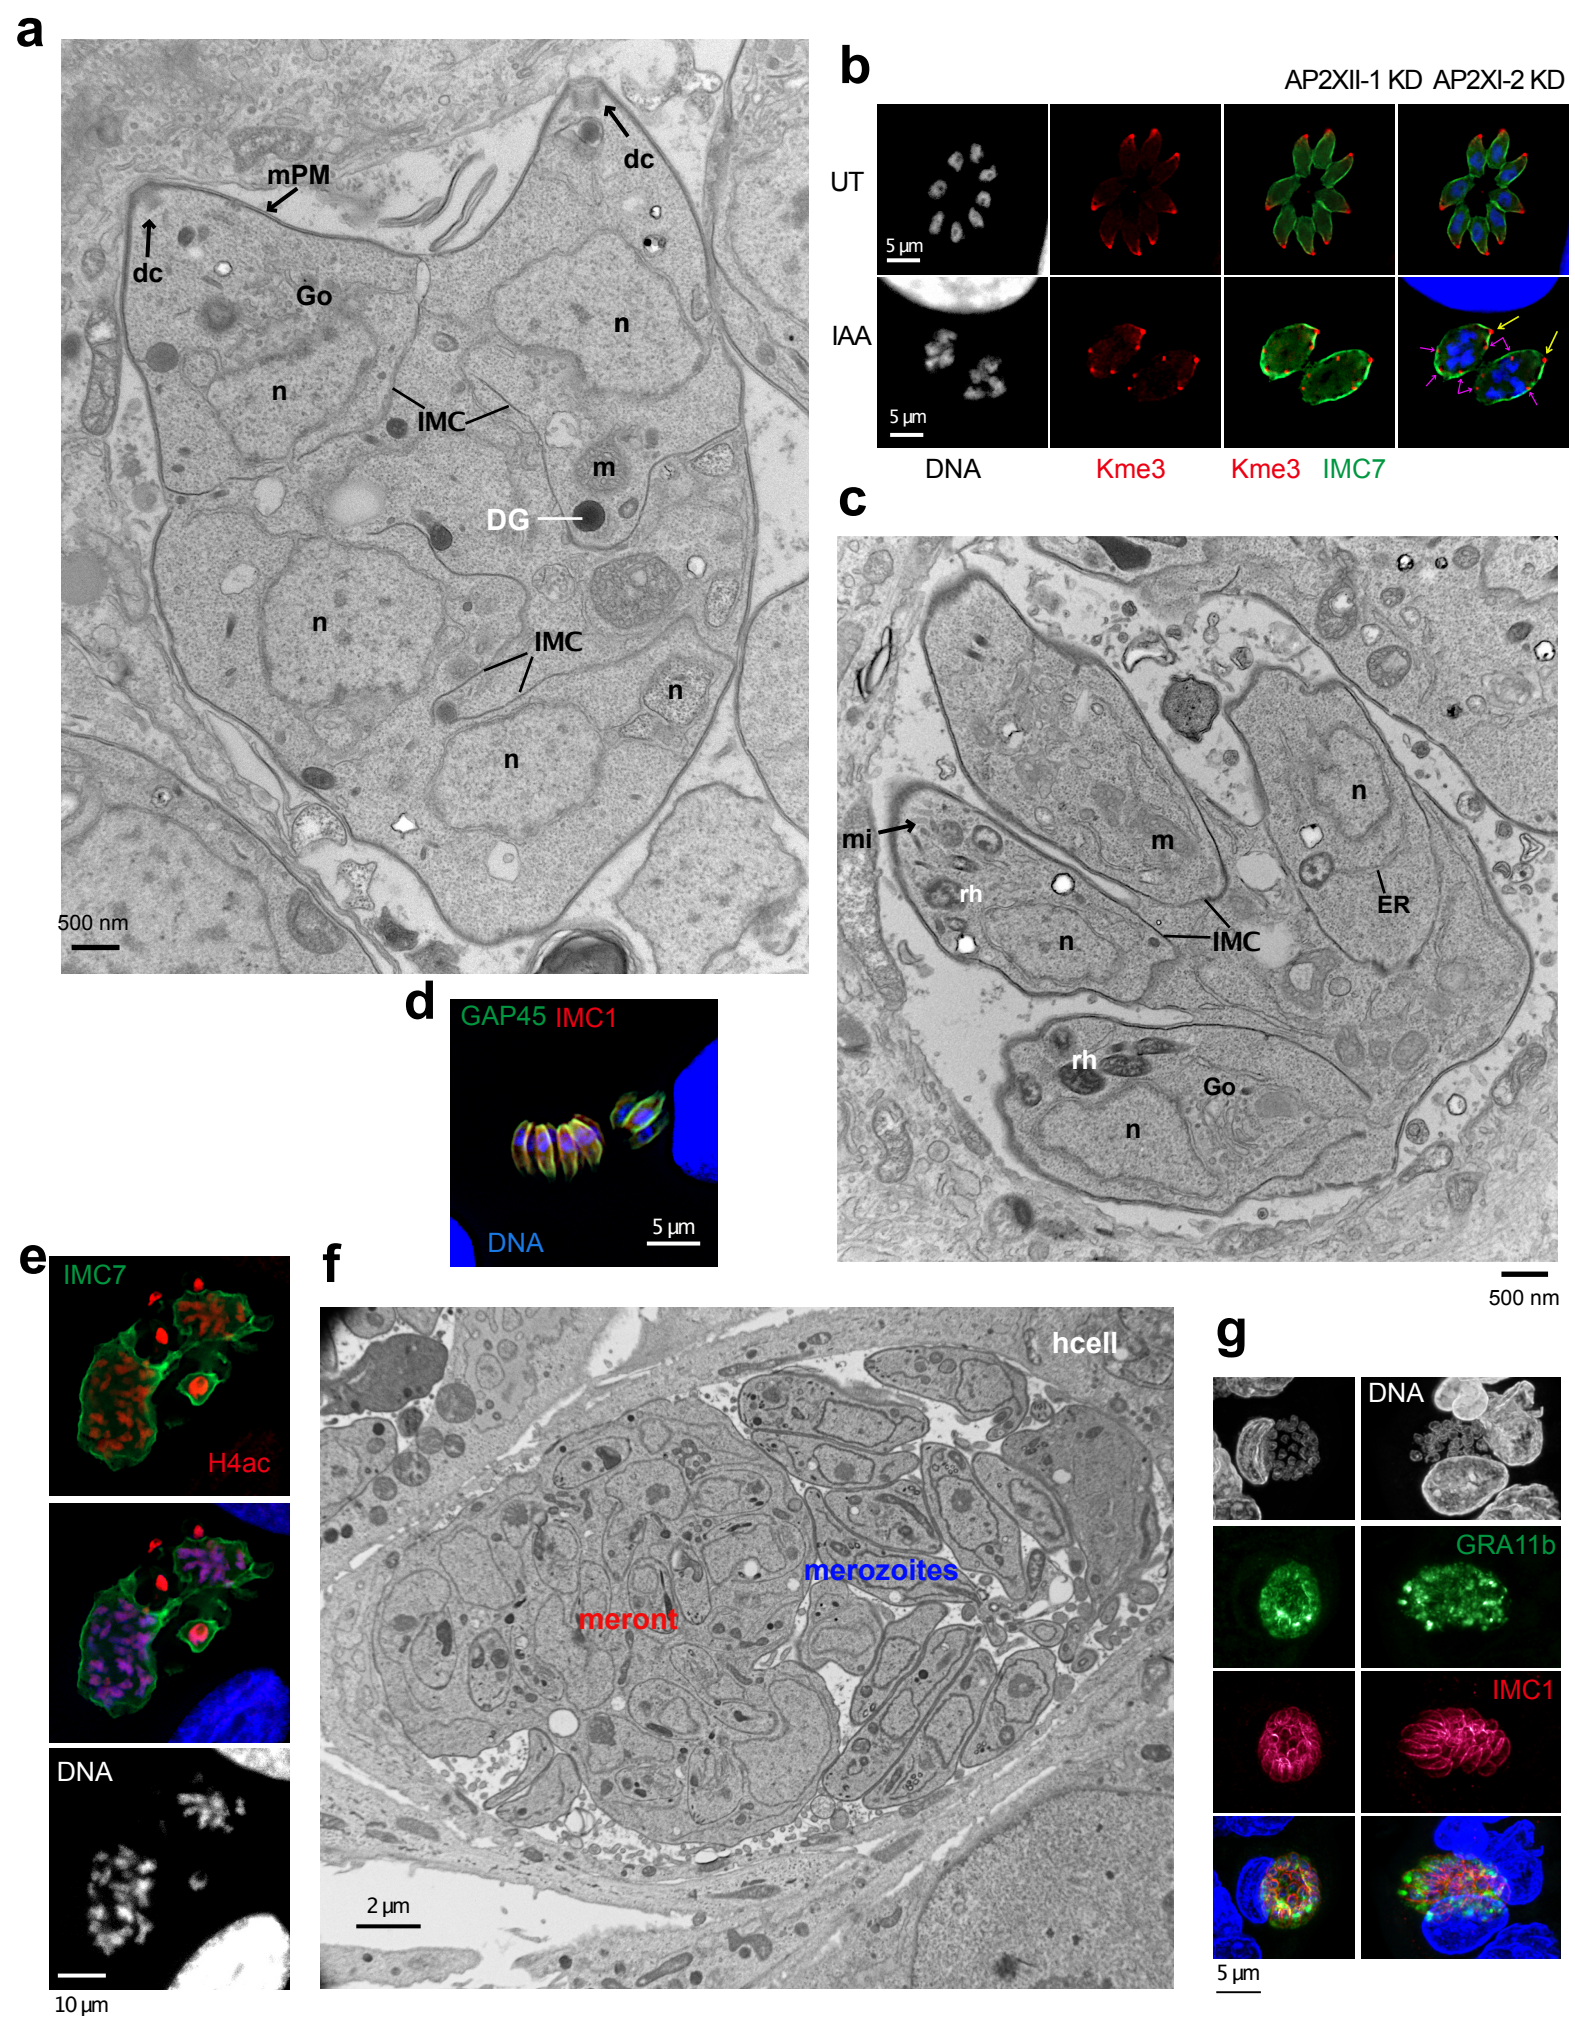

**Figure 4**

**Fig. 4 | *In vitro* induced merogony typified by the emergence of multiple zoite stages.** Electron micrograph images of RH (AP2XII-1 KD/AP2XI-2 KD)-infected HFFs treated for 24 hours (**a**, **c**) or 48 hours with IAA (**f**). **a**, Emphasis on protruding daughters sharing the mother plasma membrane. mPM: mother plasma membrane, Go: Golgi apparatus, n: nucleus, DG: dense granule, m: mitochondrion, dc: daughter conoid. **b**, Tachyzoites (UT) and AP2XII-1/AP2XI-2-depleted meronts (24 hours post-IAA) were fixed and stained with H3K9me3 (red) and IMC7 (green) and Hoechst DNA-specific dye (white or blue). Yellow and pink arrows indicate mother and daughter conoids, respectively. **c**, Emphasis on daughter cell emergence. mi: microneme, m: mitochondrion, ER: endoplasmic reticulum, Go: Golgi apparatus, n: nucleus, rh: rhoptry, IMC: inner membrane complex. **d**, Representative image of neatly aligned elongated merozoites and forming fan-like structures as they hatch from the mother cell. Mature merozoites are co-stained with GAP45 (green), IMC1 (red) Hoechst DNA-specific dye (blue). **e**, Image of a giant schizont delineated by IMC7 (green) showing polyploidy (n=16). The nuclear structure is co-stained with Hoechst DNA-specific dye and hyperacetylated histone H4 (red). **f**, Emphasis on large PV containing a mega meront with many daughter buds residing with merozoites in the same PV. hcell: host cell. **g**, Maximal intensity projection of a confocal microscopy z-stack from meront in infected small intestine of a kitten. Antibodies against GRA11b (green) mark the dense granules and against IMC1 (green) the inner membrane complex of individual merozoites. Nuclei are counterstained with DAPI.

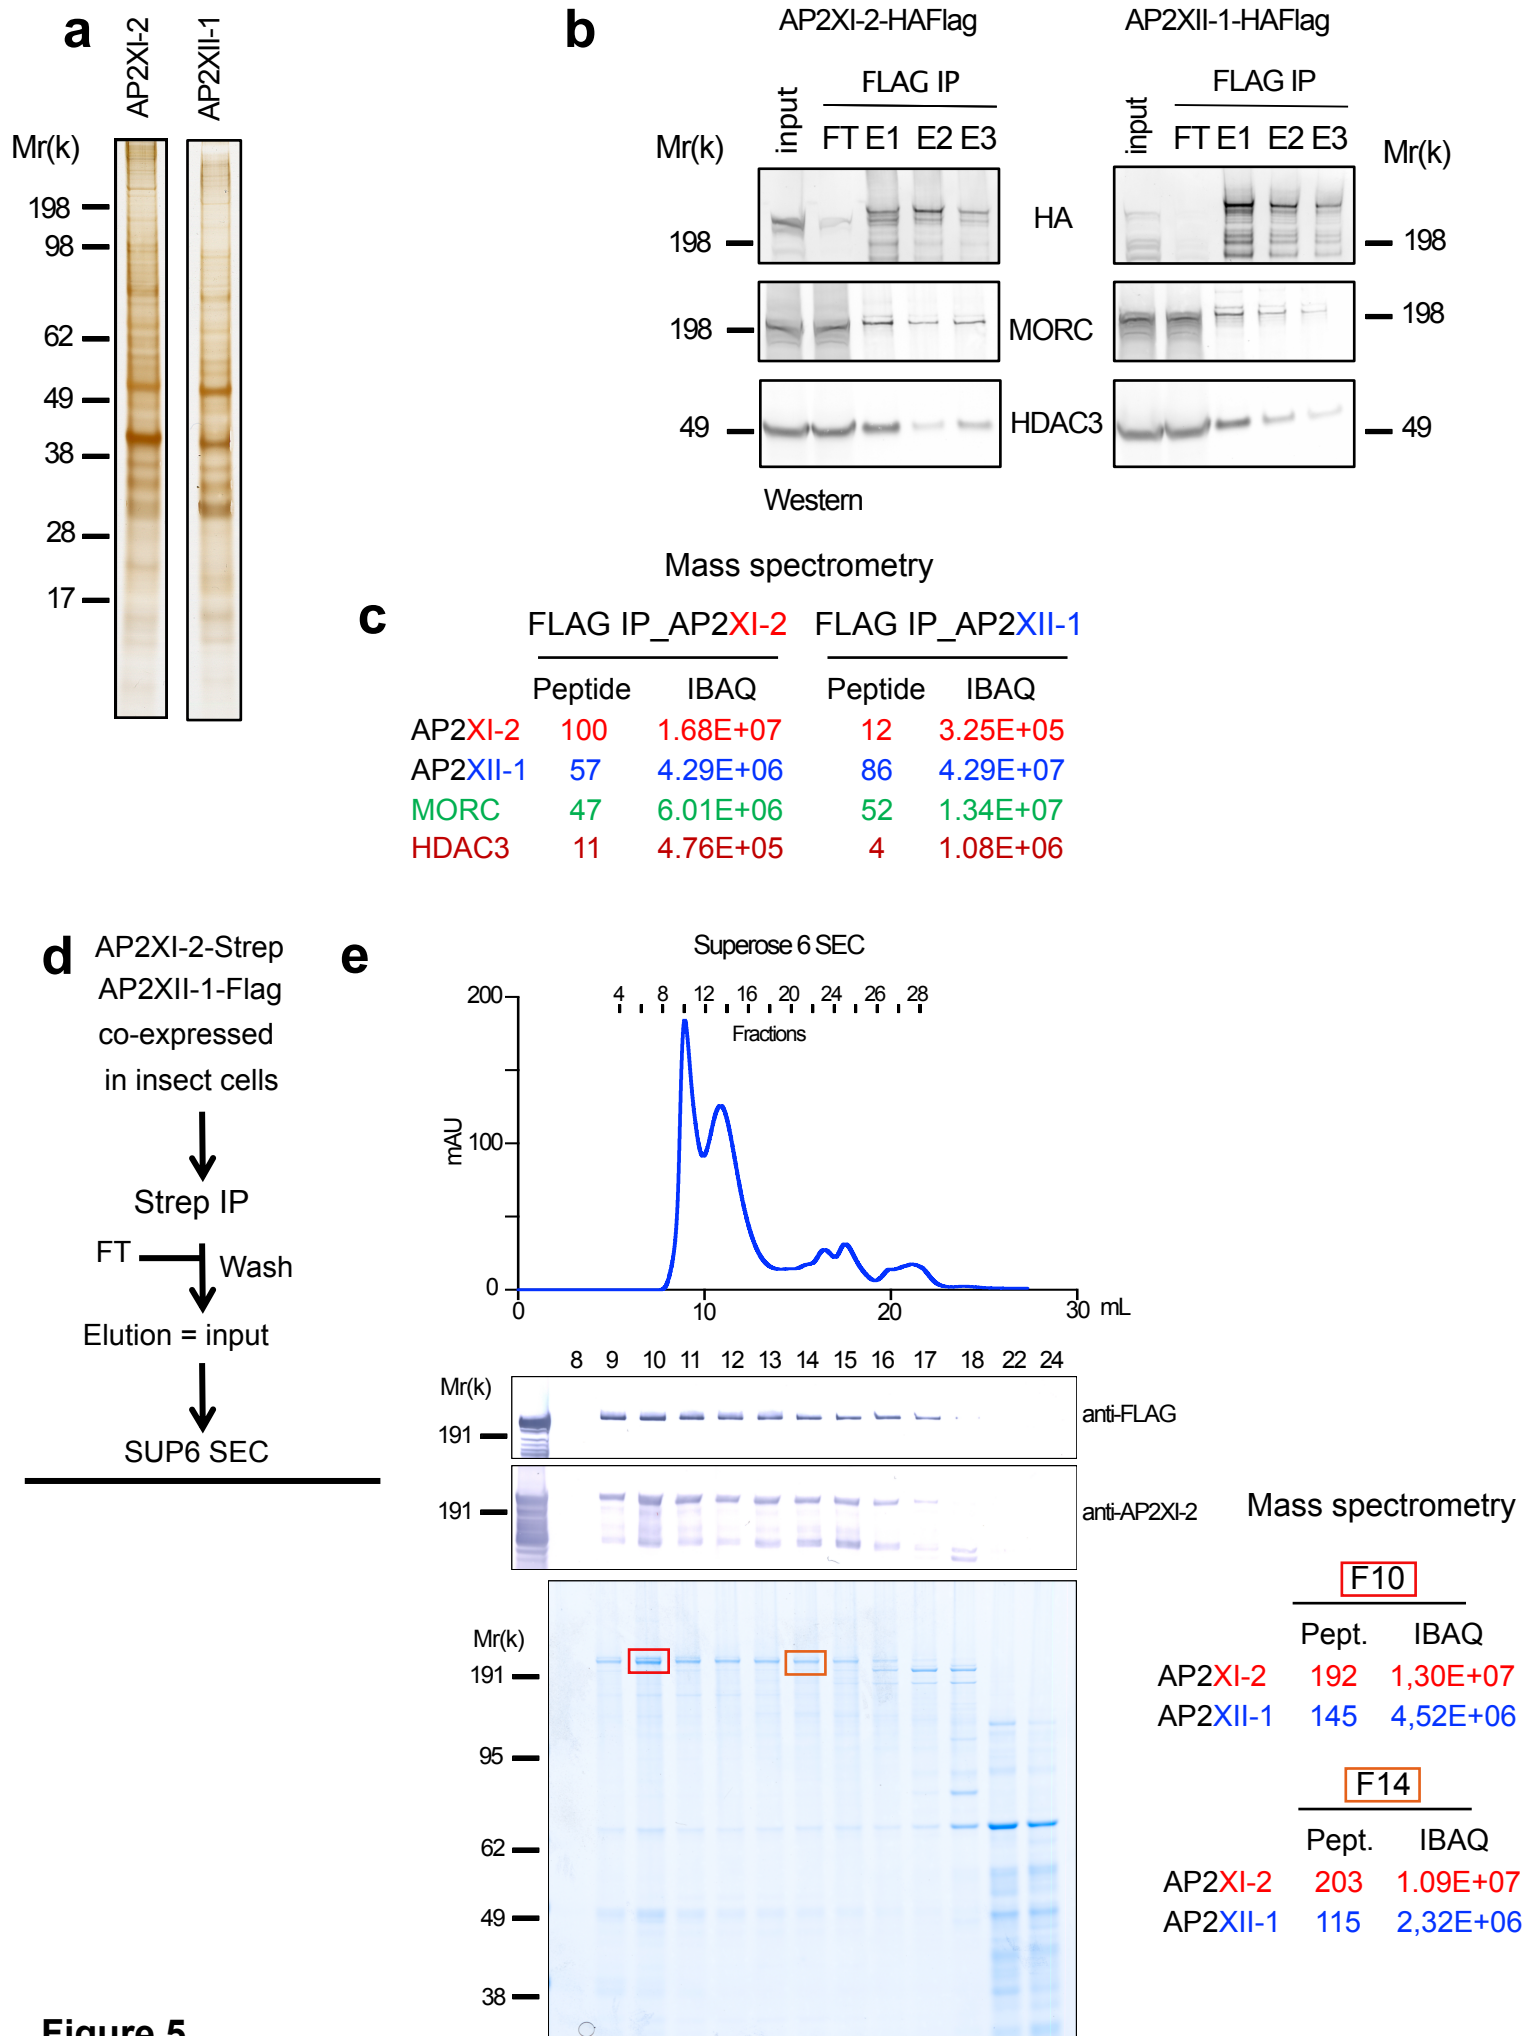

Figure 5

**Fig. 5 | AP2XII-1 and AP2XI-2 heterodimerize and interact with HDAC3 and MORC to form a repressive core complex.** **a**, AP2XII-1 or AP2XI-2 were ectopically tagged with HAFlag in the RH strain, and their associated proteins were purified by FLAG chromatography. Silver staining shows their first eluted fraction. **b**, Flag affinity eluates were analysed by Western blot to detect MORC and HDAC3. **c**, MS-based proteomic analysis of AP2XI-2 and APXII-1 FLAG elutions identified MORC and HDAC3 subunits and APXII-1 in the AP2XI-2 purification and *vice versa*. Number of identified peptides and intensity based absolute quantification (iBAQ) value are indicated. **d**, Chromatographic purification scheme of AP2XI-2-Strep and APXII-1-Flag co-expressed in *Trichoplusia ni* (Hi-5) insect cells. **e**, Strep-tactin XT purified proteins were fractionated on a Superose-6 increase gel filtration column. Input (strep-tactin elution) and gel filtration fractions were separated by SDS -polyacrylamide gel and analyzed by Western blot using anti FLAG and in-house anti-AP2XII-2 antibodies. Fraction numbers are indicated at the top of the gel. MS-based proteomic analyzes of fractions 10 and 14 are indicated on the right side of the graph. Number of identified peptides and iBAQ values are indicated.

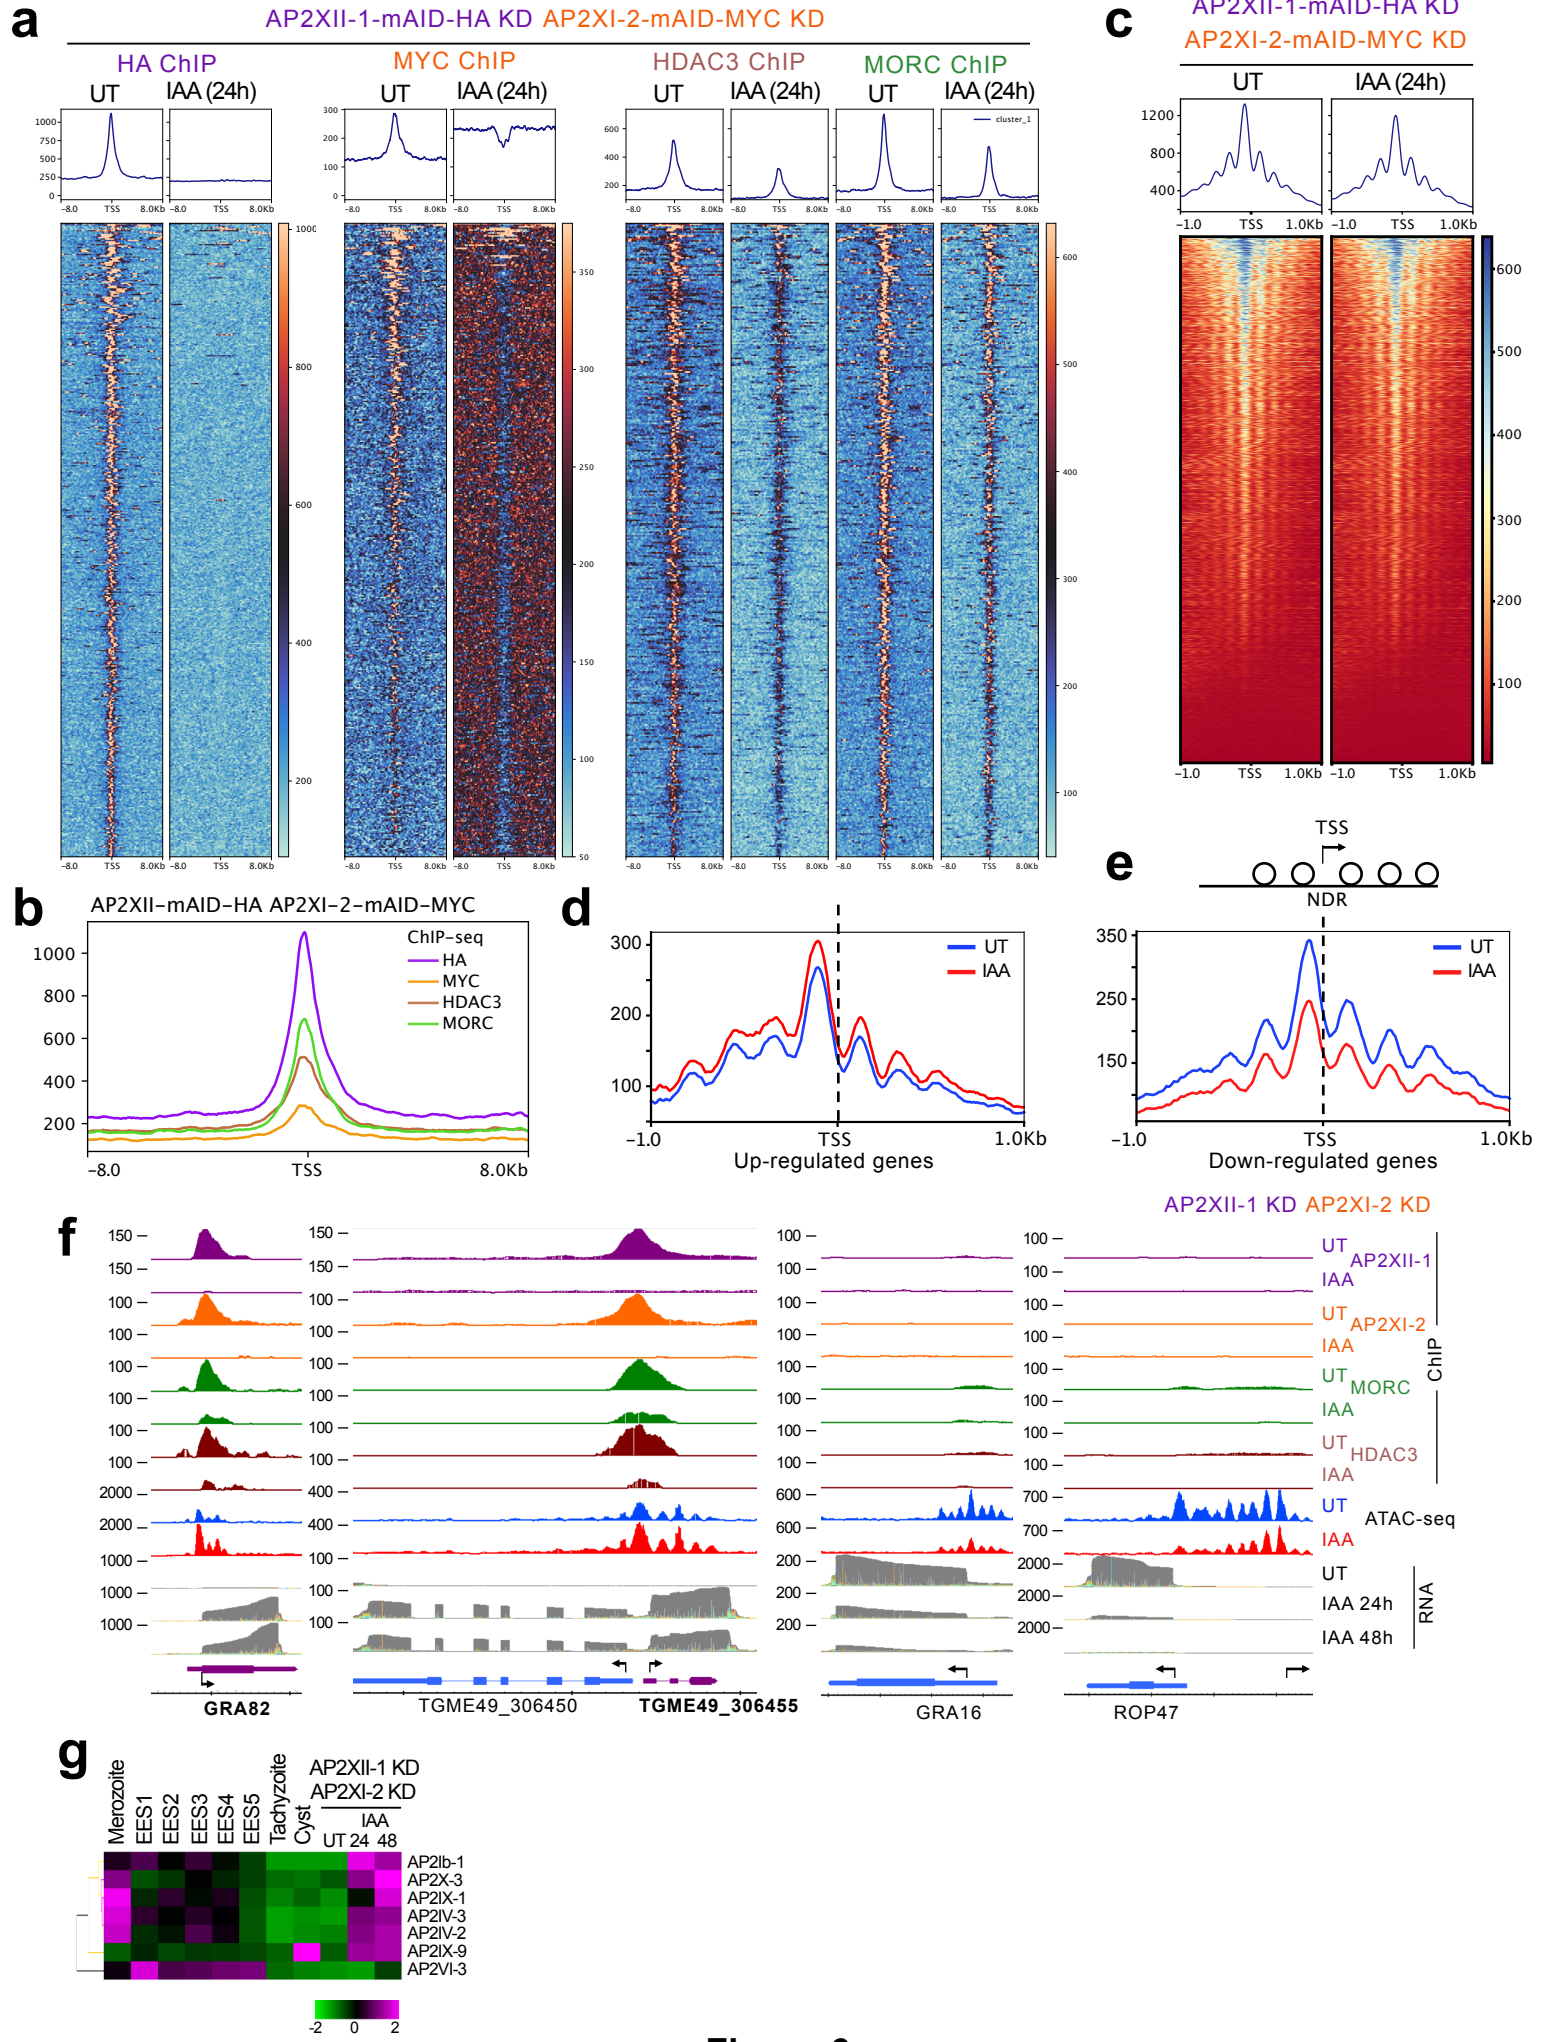

Figure 6



**Fig. 6 | Recruitment of HDAC3 and MORC to chromatin is mediated jointly by AP2XII-1 and AP2XI-2.** **a**, Profile and heat maps of averaged sum ChIP-seq called peaks showing binding of APXII-1 (HA), AP2XI-2 (MYC), HDAC3, and MORC in the vicinity of TSS of annotated gene promoters before and after addition of IAA. The top panels show the average signal profile on genomic loci centered at TSS ( $\pm 8$  kb). The lower panels show heat maps of peak density around the same genomic loci. The color scale for interpreting signal intensity is on the right side of each graph. **b**, Superposed profile plots show the co-enrichment of APXII-1 (HA) ChIP-Seq signals with AP2XI-2 (MYC), HDAC3, and MORC signals around TSS of annotated gene promoters in the untreated state. **c**, Profile and heat maps of averaged sum show Tn5 transposase accessibility (ATAC-seq) for *T. gondii* genes centered at TSS ( $\pm 1$  kb) in untreated (UT) and IAA-treated (24 hours) samples. High read intensity is shown in blue. The average signal profile is plotted above. **(d, e)** Tn5 Transposase accessibility plot in *T. gondii* allows for nucleosomal occupancy prediction. Comparison of coverage profiles of ATAC-seq read signals of untreated and IAA-treated (24 hours) across down-regulated genes ( $n=226$ ) and up-regulated genes ( $n=281$ ) relative to TSS ( $\pm 1$  kb). ATAC-seq enrichment plot shows that the nucleosome-depleted region (NDR) at TSS, while mono-nucleosome fragments are enriched at flanking regions and show phased nucleosomes at the  $-2$ ,  $-1$ ,  $+1$ ,  $+2$ , and  $+3$  positions. **f**, IGB screenshots of four genomic regions with representative merozoite and tachyzoite genes. ChIP-seq signal occupancy for HA, MYC, MORC, and HDAC3 are shown in the untreated state and after simultaneous depletion of AP2XII-1-mAID- HA and AP2XI-2-mAID-MYC. RNA-seq data for different induction time points are shown as M-pileup representation of the aligned nanopore reads. Tn5 Transposase accessibility profiles are plotted for both conditions. **g**, Heat map showing hierarchical mRNA clustering analysis (Pearson correlation) of AP2 TFs regulated by simultaneous depletion of AP2XII-1 and AP2XI-2. Shown is the abundance of their transcripts at different developmental stages, namely merozoites, EES, tachyzoites, and cysts. The color scale indicates the  $\log_2$ -transformed fold changes. Heatmap and profile plots (panels **a-e**) were generated using the Deeptools program. Panels **a, b** use the [Extended Data Fig 5a](#) cluster 2 geneset while panel **d** and **e** use up- and down-regulated genesets established by Illumina RNA sequencing.
